1           Population size, density, and ranging behaviour in a key  
2           leopard population in the Western Cape, South Africa

3           Short title: Leopard population estimates and ranging behaviour

4  
5 Lana Müller<sup>1\*</sup>, Willem D. Briers-Louw<sup>2</sup>, Barbara Seele<sup>1</sup>, Christiaan Lochner<sup>1</sup> and  
6 Rajan Amin<sup>3</sup>

7  
8 <sup>1</sup>The Cape Leopard Trust, Tokai, Cape Town, South Africa

9 <sup>2</sup>Zambeze Delta Conservation, Coutada 11, Marromeu, Mozambique

10 <sup>3</sup>Conservation Programmes, Zoological Society of London, Regent's Park, London, UK

11

12 \*Corresponding author

13 Email: [lana1985@gmail.com](mailto: lana1985@gmail.com)

14

15

## 16 **Abstract**

17 Globally, leopards are the most widespread large felid. However, mounting anthropogenic  
18 threats are rapidly reducing viable leopard populations and their range. Despite the clear  
19 pressures facing this species, there is a dearth of robust and reliable population and density  
20 estimates for leopards across their range, which is particularly important in landscapes that  
21 consist of protected and non-protected areas. We conducted a camera trapping survey  
22 between 2017 and 2018 in the Western Cape, South Africa to estimate the occupancy,  
23 density, and population size of a leopard population. Leopards were recorded at 95% of  
24 camera trapping sites, which resulted in a high occupancy that showed no significant variation  
25 between seasons, habitat types, or along an altitudinal gradient. Our results indicated a low  
26 leopard density in the study area, with an estimated 1.53 leopards/100 km<sup>2</sup> in summer and  
27 1.62 leopards/100 km<sup>2</sup> in winter. Mean leopard population size was therefore estimated at 107  
28 and 113 individuals in the winter and summer respectively. Leopard activity centres for female  
29 ranges were centred in the core study area and could be predicted with good certainty, while  
30 males appeared to move out of the study area during winter which resulted in a higher  
31 uncertainty in locations of activity centres. Interestingly, livestock depredation events in the  
32 surrounding farmlands were significantly higher in winter, which coincides with male leopards  
33 moving outside the core protected area into the surrounding farmlands. To reduce livestock  
34 losses and retaliatory leopard killings, we suggest that human-carnivore conflict mitigation  
35 measures be intensely monitored during the winter months in the study area. We also suggest  
36 that future leopard conservation efforts should focus on privately-owned land as these non-  
37 protected areas contain the majority of the remaining suitable leopard habitat and may provide  
38 important dispersal corridors and buffer zones on which the long-term sustainability of leopard  
39 populations depends.

40

41 **Keywords:** camera trapping, density, leopard, occupancy, *Panthera pardus*, SECR, Western  
42 Cape

43

## 44 **Introduction**

45 Leopards are the most widespread felid worldwide, ranging across much of Africa and tropical  
46 Asia [1]. However, in the past century their range has declined globally by 63-75% and in  
47 Africa by 48-67% [2] with the most significant range loss having occurred in North and West  
48 Africa [2, 3]. As a result, leopards were up-listed to Vulnerable on the IUCN Red List in 2016  
49 and have maintained this status due to increasing anthropogenic threats [3]. Habitat loss and  
50 fragmentation, prey-base depletion due to illegal bushmeat poaching, and retaliatory killing as  
51 a result of livestock depredation are the main drivers of leopard population decline across their  
52 range, while unsustainable trophy hunting and poaching for body parts also pose major threats  
53 to leopards [3-7].

54 In South Africa, approximately 20% of the country is considered suitable leopard habitat,  
55 with only one third of this habitat falling within protected areas [8]. Their distribution is highly  
56 fragmented and has been grouped into four core regions: 1) west and southeast coast of  
57 Western and Eastern Cape Provinces, 2) interior of KwaZulu-Natal Province, 3) Kruger  
58 National Park and interior of Limpopo, Mpumalanga and North West Provinces, and 4) a  
59 northern region, containing the Kgalagadi Transfrontier Park and adjacent areas of the  
60 Northern Cape and North West Province [8]. Each of these subpopulations contain fewer than  
61 1,000 mature individuals, with the exception of the Kruger National Park and the interior of  
62 Limpopo, Mpumalanga, and North West Provinces [8]. Current models suggest that the  
63 national leopard population is likely to suffer further declines, particularly outside protected  
64 areas where leopards are at risk due to snaring, poisoning, problem animal control, and  
65 unregulated trophy harvesting [3, 8].

66 In the Western Cape, leopards are the last remaining large carnivore after other large  
67 carnivores such as spotted hyena (*Crocuta crocuta*) and lion (*Panthera leo*) were extirpated  
68 several centuries ago [9, 10]. However, leopards in the Cape have suffered substantial long-  
69 term persecution and habitat loss [11]. Leopards were considered 'vermin' until 1968 by the

70 Administration of the Cape Province and it was only in 1974 that they were declared a  
71 “protected wild animal” in the province, which meant that a permit was required to trap or shoot  
72 a leopard (Nature Conservation Ordinance No. 19 of 1974) [12, 13]. Despite these changes  
73 in legislation, persecution of leopards continues due to livestock depredation on privately-  
74 owned farms [11, 12, 14]. Their persistence in the province is largely due to the protection of  
75 rugged mountain landscapes, which provide important refuges, as well as their adaptability  
76 within the human-dominated landscape.

77 Throughout the Western Cape Province there is approximately 50,000 km<sup>2</sup> of potential  
78 leopard habitat remaining, with only 15,000 km<sup>2</sup> within conservation areas and mountain  
79 catchment zones, and the other 35,000 km<sup>2</sup> within privately-owned farmland and surrounding  
80 small towns [8, 15]. In the province, leopards appear to have one of the lowest densities in the  
81 country, ranging from 0.25–2.3 individuals/100 km<sup>2</sup>, and are also known to occupy large home  
82 ranges (35–910 km<sup>2</sup>) [16, 11] which expose leopards to detrimental edge effects, especially if  
83 they move beyond the borders of the protected areas [17]. Given their range and habitat  
84 restrictions as well as conflict with humans, it is essential to better understand leopard spatial  
85 distribution, density, and trends within the region to facilitate informed decision-making to  
86 improve conservation efforts for the species [18].

87 Currently, there is a paucity of robust density estimates for leopards across their range.  
88 However, inappropriate attempts to estimate leopard populations on a broad-scale [19, 20]  
89 may also result in more harm than good, as critiqued by Norton [21]. For example, the issuing  
90 of problem animal control permits and trophy hunting quotas are typically based on  
91 overestimated leopard densities [21, 22]. Such inaccuracies can lead to poor management  
92 recommendations [23] and may have major implications for leopard conservation [17, 22],  
93 such as the incorrect assumption that the leopard conservation status is assured [24]. Thus,  
94 it is crucial that research efforts prioritize the collection of robust density estimates to improve  
95 management and conservation of this charismatic species [25, 6, 22, 26].

96 Efforts have previously been made to provide population estimates for leopards in the  
97 Cederberg region of the Western Cape. However, these studies were limited to the radio

98 collaring of a few individuals [11, 27], spoor counts [28], as well as less robust camera trapping  
99 methods [11], which provided a wide range of imprecise estimates. The main aim of this study  
100 was to provide robust estimates of the density and distribution of a leopard source population  
101 in the Western Cape of South Africa. Furthermore, we provide seasonal leopard range  
102 patterns and assess its implication on livestock depredation.

103

## 104 **Methods**

### 105 *Study area*

106 The study was conducted in the Cederberg mountains (32°27'S; 19°25'E) in the Western  
107 Cape, South Africa (Fig. 1). This area lies approximately 200 km north of Cape Town and  
108 slightly east of the towns of Clanwilliam and Citrusdal [29]. The area covers approximately  
109 3,000 km<sup>2</sup> of rugged mountainous terrain of which 1,500 km<sup>2</sup> are protected. The protected  
110 area includes Matjiesrivier Nature Reserve, the Cederberg Wilderness Area, the Cederberg  
111 Conservancy, and Bushmans Kloof Wilderness Reserve. The remaining area primarily  
112 consists of privately owned farms. Up until the 1990's, livestock farming represented the main  
113 land use in the area [11] and the Cederberg was regarded as one of the largest farmer-leopard  
114 conflict hotspots in the Western Cape [27]. Since then, other farming practices such as wine,  
115 citrus, olive, and tea (rooibos and buchu) have become more common. Tourism has also  
116 increased in the area due to attractions such as camping, hiking, rock climbing, and mountain  
117 biking.

118

119 **Fig 1. Camera trap sampling locations (n = 73) within the Cederberg study area. Insert**  
120 **shows the study area (black square) within the Western Cape Province (light grey),**  
121 **South Africa.**

122

123 The semi-arid Cederberg landscape lies within the Cape Floristic Kingdom and is home  
124 to several endemic plant species such as the Clanwilliam cedar (*Widdringtonia*

125 *cedarbergensis*), the snow protea (*Protea cryophile*), and the red rocket pincushion  
126 (*Leucospermum reflexum*) [30]. Furthermore, the Cederberg also represents an important  
127 intersection of two biomes, with the Fynbos Biome in the west consisting of fynbos (restioids,  
128 ericoids and proteoids) and renosterveld vegetation (*Renosterbos* spp.), and the Succulent  
129 Karoo biome in the east comprising of small shrubs and succulents [31]. The topography in  
130 both biomes consists of rugged sandstone and shale mountains divided by valleys and ravines  
131 that are either densely wooded or open [29]. In the fynbos section, altitude ranges from 200  
132 to 2026 m, while in the Karoo section it varies from 258 to 1446 m [29].

133 The Cederberg has a Mediterranean climate with winter from April to September and an  
134 austral summer from October to March [29]. Mean temperatures range from 22 to 40 °C in  
135 summer and 10 to 15 °C in winter, with sporadic snowfall on the higher mountain peaks [32].  
136 Conditions can be harsh with extreme temperatures reaching up to 47 °C in summer and  
137 below freezing (−7 °C) in winter [29]. Rainfall primarily occurs during winter with occasional  
138 thunderstorms in summer. The wetter Fynbos Biome has a mean annual rainfall of 669 mm,  
139 while the drier Karoo biome has a mean annual rainfall of 179 mm [29].

140

#### 141 *Camera trapping and data processing*

142 We had 73 camera trap sampling locations distributed across the study area from October  
143 2017 to September 2018, covering an effective sampled area of 2,823 km<sup>2</sup> (Fig. 1). The area  
144 was divided into grid cells of 50 km<sup>2</sup> based on the minimum home range size of female  
145 leopards in the Cederberg [11]. Each grid cell contained a minimum of two paired camera trap  
146 stations to ensure sufficient coverage of all potential leopard home ranges. The inter-camera  
147 station distance was set at a minimum of 2 km. Camera stations were located on hiking trails,  
148 game trails, jeep tracks, or along natural features (i.e. gorges or drainage lines) where it was  
149 likely for leopard movement to be channelled past the camera stations. Sites with signs of  
150 leopard presence (i.e. scat, tracks, or scratch trees) were also selected. A pair of white-flash  
151 cameras (Cuddeback X-Change Color Model 1279) were placed 2–3 m from the trail, with the  
152 cameras placed on either side of the trail. Camera traps were positioned perpendicular to the

153 trail at a height of approximately 40 cm above the ground to obtain full lateral body images of  
154 passing animals [11]. As the rosette patterns of a leopard are asymmetrical on either side of  
155 the body, paired cameras allowed for a simultaneous left and right flank image to facilitate the  
156 accurate identification of individuals. Cameras were set to operate 24 hours a day, to take  
157 three photo bursts every time the sensor was triggered with a minimum trigger delay of 1/4 of  
158 a second. The flash strength setting varied between the “indoor” setting for narrow trails to the  
159 “close” setting for wider jeep tracks. Vegetation was pruned to the ground in front of each  
160 camera to limit false triggers. Cameras were serviced (batteries replaced, images  
161 downloaded, and vegetation pruned, if necessary) once every two months. Images were  
162 processed using *Camera Base* version 1.3 [33]. All animals in the photographs were manually  
163 identified to species level, while leopards were identified to individual level using the pattern  
164 recognition program *HotSpotter* [34]. Individual leopards were subsequently manually verified  
165 and compared to the Cederberg leopard database. A threshold of 30 minutes was used to  
166 temporally distinguish independence of unique leopard photo-capture events [35].

167

#### 168 *Population size and density*

169 Leopard population densities were estimated using the Bayesian SCR method. To ensure  
170 population closure, the summer (1 October 2017 – 31 March 2018) and winter (1 April 2018 –  
171 30 September 2018) month datasets were analysed separately (Fig. 2).

172

173 **Fig 2. Individual leopard detections over the summer (light grey) and winter (dark**  
174 **grey) of 2017-2018, in the Cederberg, Western Cape.**

175

176 Leopards exhibit sex-specific differences in space-use and behaviour, with the home  
177 range of a single adult territorial male overlapping with smaller home ranges of several females  
178 [36, 37]. Location of cameras is also a likely source of capture heterogeneity [38, 39]. The  
179 model  $p_0(\text{sex}+\text{trap}).\text{sigma}(\text{sex})$ , where  $p_0$  denotes the probability of capture when the

180 distance between the animal's activity centre and the camera is zero and sigma is the ranging  
181 scale parameter, was implemented in the program JAGS (Just Another Gibbs Sampler)  
182 accessed through the program R, version 4.0.4 [40] using the package RJAGS ([http://mcmc-](http://mcmc-jags.sourceforge.net)  
183 [jags.sourceforge.net](http://mcmc-jags.sourceforge.net)). In data augmentation, M was set to 200 – larger than the largest  
184 possible population size (i.e., the number of activity centres). The centroids of capture  
185 locations of individual animals caught were used as the starting values for activity centres,  
186 ensuring these occurred in suitable habitat as defined in the habitat mask. Three Markov Chain  
187 Monte Carlo (MCMC) chains with 60,000 iterations, a burn-in of 1,000, and a thinning rate of  
188 10 were implemented. This combination of values ensured an adequate number of iterations  
189 to characterise the posterior distributions. Chain convergence was checked using the Gelman-  
190 Rubin statistic [41], R-hat, which compares between and within chain variation. R-hat values  
191 below 1.1 indicate convergence [42]. The approach of Royle et al. [43] was used for the model  
192 goodness-of-fit test, calculating three statistics, all using Freeman-Tukey discrepancies:  
193 individual animal by camera-station capture frequencies, aggregating the binary daily capture  
194 data by animals and camera-stations (FT1); individual animal capture frequencies,  
195 aggregating for each animal (FT2); and camera-station animal capture frequencies,  
196 aggregating for each camera-station (FT3).

197 Posterior distributions of adult male, female, overall population density and abundance,  
198 and male and female ranging parameters were generated from the model. Posterior locations  
199 of individual leopard activity centres were mapped, and animal density maps (individuals/km<sup>2</sup>)  
200 for the two seasons were produced by modelling the movement of animals around activity  
201 centres.

202

203 Site use

204 Leopard site use with respect to season, altitude and habitat was investigated using single-  
205 season, single-species occupancy modelling [44]. Detection histories, where '1' denoted a  
206 detection and '0' indicated a non-detection, were constructed using a five-day period as the  
207 sampling occasion. Bayesian occupancy analysis was performed in the program JAGS



208 version 4.3.0 [45] accessed through the program R, version 3.6.0 [46], using the package  
209 RJAGS version 3–10 [47]. Three Markov chain Monte Carlo (MCMC) chains were run with  
210 110,000 iterations, a burn-in of 10,000 and a thinning rate of 10. Chain convergence was  
211 checked with trace plots and the Gelman-Rubin statistic  $R$ -hat [41], which compares between  
212 and within chain variation.  $R$ -hat values below 1.1 indicate convergence [42]. Model fit was  
213 assessed using the Freeman-Tukey discrepancy measure [48]. Seasons were divided into a  
214 cool-wet winter and a hot-dry summer, altitude was calculated using a handheld GPS at each  
215 camera trap location, and habitat was classified into Fynbos and Karoo biomes [11].

216

### 217 *Seasonal livestock depredation*

218 Reported livestock depredation data from the Cederberg region were obtained from  
219 CapeNature (the governmental organization responsible for biodiversity conservation in the  
220 Western Cape) for the period April 2009 to October 2018. In R, we used the package ‘lme4’  
221 to perform a generalized linear model with a Poisson distribution to test the effect of season  
222 on livestock depredation by leopard. Depredation events were grouped per month and multiple  
223 livestock killed in a single day (from the same area) were grouped into a single event. We set  
224 months nested within years as a random effect in the model due to the unequal number of  
225 repeated samples for each month.

226

## 227 **Results**

### 228 *Sampling effort*

229 Camera traps were active for 25,985 trap days (13,335 days in winter and 12,650 days in  
230 summer), with a total of 293,775 photographs obtained (excluding duplicate photographs from  
231 opposite cameras). Overall, 32 mammal species were photographed, 4 livestock species  
232 (goat, sheep, donkey, and cow), 3 domestic species (dog, cat, and horse), as well as various  
233 birds and reptiles. A total of 2,638 photographs were taken of leopards, which yielded 831  
234 independent leopard captures ( $n=434$  in summer,  $n=397$  in winter). Leopards were

235 photographed at 95% of camera trap stations (n=69). Overall, a mean trap rate of 3.19  
236 independent photographs per 100 days of sampling was recorded, and this was slightly higher  
237 in the summer (3.43) than in the winter (2.97).

238 In total, 63 different individual adult leopards were identified, consisting of 31 females, 26  
239 males, and six of unknown sex. The accumulation curve for individual leopards in both summer  
240 and winter indicated that 80% of the individuals detected were counted within the first 100  
241 days of trapping (Fig. 3).

242

243 **Fig 3. Accumulation curve for individual leopards for summer (left) and winter (right).**

244

#### 245 *Population size and density*

246 The Bayesian model fitted well to the data for both seasons (FT1, FT2, FT3 P=0.3-0.5), and  
247 R-hat values for all model parameters were below 1.1.

248

249 Leopard density was estimated as 1.53 (CV: 12.4%, 95% CI: 1.18–1.89) leopards/100 km<sup>2</sup> in  
250 winter and 1.62 (CV: 12.2%, 95% CI: 1.25–2.01) leopards/100 km<sup>2</sup> in summer (Table 1).

251 Leopard density was more concentrated towards the central study area during summer, while  
252 in winter, leopard density was more spread-out across the study area with an increase in  
253 leopard density towards the periphery of the study area (Fig. 4).

254

255 **Table 1. Estimates of Bayesian spatial capture recapture model parameters. Sigma is**  
256 **the ranging scale parameter.**

257

258 **Fig 4. Expected density of individual leopards (individuals/km<sup>2</sup>) predicted from the**  
259 **Bayesian SCR model, for summer (left) and winter (right).**

260

261 Leopard density was significantly higher for females than males, both in summer and winter  
262 (posterior probability=1), with adult female to male ratio of 2.42:1 (95% CI: 1.34–3.55) for the  
263 summer period and 2.45:1 (95% CI: 1.53–3.47) for the winter period. The estimated mean  
264 leopard population size for the effectively sampled area based on the habitat mask was 113  
265 (95% CI: 87–140) in summer and 107 (95% CI: 82–132) in winter.

266

#### 267 *Site use*

268 Leopard site use was high throughout the study area as leopards occurred at almost all  
269 camera trap sites. Site use was not affected by habitat type, Karoo: 0.9 (95% CI: 0.79–0.99)  
270 in summer and 0.9 (95% CI: 0.80–0.99) in winter, fynbos: 0.84 (95% CI: 0.74–0.94) in summer  
271 and 0.88 (95% CI: 0.80–0.96) in winter (S1 Fig). Leopards were also not influenced by altitude  
272 with site use remaining high (>0.8) along the altitudinal gradient during both seasons (S2 Fig).

273

#### 274 *Ranging behaviour*

275 Adult male movement parameter 'sigma' was significantly larger than the adult female  
276 sigma in both seasons (posterior probability=1, Table 1). Male leopard sigma was also  
277 significantly larger in winter compared to the summer (posterior probability=1). Activity centres  
278 of female leopards were mostly concentrated around the study core area in both seasons,  
279 while males displayed wider ranging behaviour with greater uncertainty in their activity centres  
280 (Figs. 5 and 6). Based on the half-normal detection model [49], the estimated average home  
281 range radius was 12.05 km (95% CI: 11.05–13.06 km) for adult male leopards and 6.10 km  
282 (95% CI: 5.41–6.81 km) for adult female leopards in summer. In winter, average home range  
283 radius was 16.51 km (95% CI: 14.70–18.38 km) for males and 7.62 km (95% CI: 6.37–8.99  
284 km) for females. Estimated home range size was 456 km<sup>2</sup> for males and 117 km<sup>2</sup> for females  
285 in summer and 856 km<sup>2</sup> for males and 182 km<sup>2</sup> for females in winter.

286

287 **Figure 5. Activity centre posterior distributions (black dots); capture locations (yellow**  
288 **circles); and trap locations (red crosses) for all recorded adult females (left) and adult**  
289 **males (right), in the summer.**

290

291 **Figure 6. Activity centre posterior distributions (black dots); capture locations (yellow**  
292 **circles); and trap locations (red crosses) for all recorded adult females (left) and adult**  
293 **males (right), in the winter.**

294

295 *Seasonal Livestock depredation*

296 The number of reported livestock depredation events by leopards differed significantly  
297 between seasons ( $Z = 3.9$ ,  $p < 0.0001$ ). Mean monthly depredation events reported during  
298 summer were 1.4 (max = 4) and 2.5 (max = 10) during winter.

299

## 300 **Discussion**

301 Robust population estimates are key requirements for the effective conservation of threatened  
302 species [18]. Previous attempts to estimate leopard densities in the Cederberg were based on  
303 a variety of methods, which were both limited and yielded wide-ranging estimates [11, 27, 28].  
304 Our study provides the first methodologically and statistically rigorous survey of leopards in  
305 the Cederberg by using a Bayesian SCR method on an extensive camera trapping survey.  
306 Given the mounting threats facing leopards throughout their range, our study has provided  
307 valuable insights into the status and spatial distribution of this elusive species across such a  
308 largely human-dominated landscape.

309 Our study revealed a relatively low mean leopard density of 1.53–1.62 leopards/100 km<sup>2</sup>,  
310 which corresponds with density estimates from other leopard populations in the Western and  
311 Eastern Cape Provinces of South Africa [11, 14, 16, 50]. Therefore, along with these studies,  
312 our data suggest that leopards occur at a low density (<2 leopards/100 km<sup>2</sup>) throughout the  
313 region. Although the methodologies used to calculate leopard densities between this study

314 and Martins' study [11] differed (SCR vs. telemetry data), the similar densities suggest that  
315 the Cederberg leopard population has remained relatively stable for at least the past decade.  
316 Comparing densities using two different methods is generally not advised, however Devens  
317 et al. [16] found that little variation exists between density estimates obtained from SECR and  
318 GPS/telemetry methods. Our estimates were also comparable to leopard densities from other  
319 semi-arid environments in southern Africa [51, 52].

320 Leopards in the Cape occur in a highly modified and fragmented landscape and their low  
321 densities are likely a consequence of several bottom-up and top-down processes. Firstly, prey  
322 availability is typically an important determinant of leopard density, as lower prey densities  
323 correlate with lower leopard densities [51, 53, 54]. In the Cederberg, leopards are exposed to  
324 a limited and small-bodied prey base [31], which is a consequence of low productivity in the  
325 area, and this could explain the low leopard densities found here and throughout the Cape  
326 region. Secondly, human-related activities may result in reduced leopard densities and recent  
327 studies suggest that anthropogenic disturbance may exert even stronger pressures on leopard  
328 space use compared to prey availability [55, 56]. Leopards in the Cape Provinces mainly occur  
329 in fragmented protected areas which are surrounded by landscapes that are largely  
330 uncondusive to their survival. Moreover, these leopard populations have experienced long-  
331 term persecution (both legal and illegal) with records of hundreds of leopards being killed  
332 within relatively short periods [57]. Within a two-year period (1988–1990), 21 leopards were  
333 legally killed as 'problem animals' in the Cederberg area through permits issued by Cape  
334 Nature (excluding illegal killing), and such off-take may well disrupt leopard population  
335 dynamics within the system [11]. Persecution of leopards still occurs in and around the study  
336 area, but at a comparatively smaller scale e.g. only two leopards were killed in six-year period  
337 (2004–2010). This was attributed to improved awareness and conservation efforts in the area  
338 [11]. Thirdly, leopard spatial distribution may be influenced by interspecific competition with  
339 dominant carnivores [54]. However, as the only remaining large carnivore in the region, these  
340 leopards have no direct competitors and are thus not spatially restricted by heterospecifics.

341 To estimate ranging behaviour, leopards are typically fitted with satellite and/or VHF  
342 collars. However, in this study we demonstrate how individual leopard activity centres were  
343 constructed using camera trapping and SECR framework. The ranging scale parameter was  
344 larger for both sexes in the winter, which coincides with the larger home ranges recorded in  
345 winter by Martins [11]. This technique can be applied to other carnivore species that are  
346 individually recognisable and may be useful to determine ranging behaviour without the need  
347 for invasive and costly collaring.

348 In areas where leopards occupy large home ranges and occur at low densities, effectively  
349 conserving viable populations within the limits of protected areas is a major challenge [53].  
350 Leopards moving beyond the 'safe zone' of protected areas become vulnerable to edge effects  
351 which can have significant impacts on population densities [17]. For example, the removal of  
352 resident leopards from non-protected areas can generate vacant gaps in the landscape, luring  
353 leopards from protected areas and leading to a 'vacuum effect' [17]. This may even affect  
354 carnivores at the very core of large protected areas [58, 59]. Our study revealed seasonal  
355 shifts in male leopard activity centres away from the protected area and into the surrounding  
356 farmland matrix during winter. These shifts could be linked to seasonal resource availability  
357 [60]. Livestock birthing peaks during the winter months (April–June), may present an attractive  
358 and easy alternative food source for leopards in farmlands. However, other factors such as  
359 leopard breeding season may also influence seasonal leopard movement within a landscape  
360 [61]. Interestingly, reported livestock depredations were significantly higher in winter  
361 compared to summer, which aligns with leopard movement into the surrounding farmland  
362 matrix, and also corresponds with the findings of Stuart [62]. Despite this, it is likely that the  
363 non-protected (privately-owned) land may play a critical role in supporting leopard home  
364 ranges [14] and their energetic requirements by providing alternative food sources during  
365 winter. Interestingly, dietary studies have revealed that livestock contributes only a fraction  
366 towards overall leopard diet (e.g. [31]), although these studies were largely conducted within  
367 the protected area.

368 Inadequate livestock guarding practices have regularly been cited as a significant  
369 contributor to livestock depredation events (e.g. [63]). Good husbandry practices are  
370 particularly important in winter when livestock birthing peaks, livestock attacks are highest,  
371 and leopards venture into human-dominated landscapes. Therefore, we identify winter as a  
372 critical period in the Cederberg for both the farmer and the leopard. We encourage researchers  
373 and PA managers to partner with livestock producers in the surrounding farmlands to quantify  
374 the effect of various conflict mitigation strategies and to generate evidence-based approaches  
375 that will ultimately improve our capacity to reduce livestock depredation events and prevent  
376 retaliations against leopards [64].

377 Occupancy results indicate that leopards are homogenously distributed across the  
378 landscape, being detected at 95% of camera trapping sites, which essentially covered the  
379 entire Cederberg protected area landscape including the Fynbos and Karoo biomes. Due to  
380 their broad distribution, leopard occupancy was largely unaffected by habitat, season, or  
381 altitude, as found by Martins & Harris [29], highlighting their adaptability and ecological  
382 plasticity. Studies show that leopard spatial distribution is negatively correlated with human  
383 encroachment around protected areas [17, 52, 55, 65]. This vulnerability is relevant to leopard  
384 conservation as they typically display higher resilience to human-related activities compared  
385 to other large carnivores [56]. A previous study from the Cederberg found that leopard space  
386 use was not influenced by human settlements [29]. However, we recommend future studies  
387 to quantify the density gradient between protected and non-protected areas in the Cederberg  
388 to investigate the anthropogenic influence on leopards and what that means for their future  
389 conservation.

390 An emerging threat to leopards in the Western Cape is illegal poaching of bushmeat [66].  
391 Wire snaring is a highly effective method for trapping small to medium-sized mammals (the  
392 intended targets); however, snares are indiscriminate and leopard mortalities due to snares  
393 are known to occur. In 2019, the Cape Leopard Trust (an NGO focused on leopard research  
394 and conservation) initiated anti-snare patrols in the Boland region of the Western Cape in an  
395 attempt to map, quantify and control this threat. At present, snaring does not seem to be

396 prominent in the Cederberg, although we do not disregard poaching as a potential threat.  
397 Poaching can result in the depletion of both predator and prey populations [55], so it is critical  
398 to monitor and control this threat. Recent studies show that drastic short-term declines in  
399 leopard populations may occur due to anthropogenic influences (e.g. [67]). It is therefore  
400 recommended that repeated studies are conducted every few years (2–3 years) using  
401 standardised SECR methods to monitor population trends and identify these changes in the  
402 population timeously and address the issues causing these declines using effective  
403 conservation intervention measures to reverse these declines [17, 68].

404 Implementation of conservation measures targeted at reducing edge effects and  
405 promoting conservation of leopards are required to ensure the long-term persistence of  
406 leopards in a human-dominated landscape. For example, through the focused research  
407 between 2004 and 2010, significant steps have already been taken to improve conservation  
408 efforts of leopards in the Cape, including: (1) abandoning the relocation of ‘problem animals’,  
409 as this practice may result in more harm than good, (2) reducing the duration of permits issued  
410 by Cape Nature to destroy ‘problem leopards’ from one month to seven days, and (3) stopping  
411 the removal of dominant leopards, as the vacancy created may soon be occupied by a new,  
412 immigrant leopard (see Martins [11]). Furthermore, increasing protected area size is an  
413 effective way of reducing edge effects and aiding wildlife conservation [17, 56, 69]. The  
414 Western Cape is largely modified and the remaining suitable leopard habitat (49,850 km<sup>2</sup> or  
415 38% of the province) is highly fragmented with current PAs comprising only one third (15,010  
416 km<sup>2</sup>) of this suitable habitat [8]. The largest proportion of suitable leopard habitat remains  
417 outside of protected areas and thus leopard conservation efforts should focus on these private,  
418 formally non-protected lands [8]. This could be achieved through stewardship sites (i.e.  
419 individual landowners committing to protect and manage their properties or parts thereof  
420 according to sound conservation management principles under the guidance and support of  
421 CapeNature) or the formation and expansion of conservancies (i.e., collaborative  
422 management of privately-owned farms to conserve biodiversity and remove lethal predator  
423 control as a management tool). Well managed conservancies may result in increased wildlife



424 populations as well as greater species resilience to environmental stochasticity [70], and  
425 conservancy members may have higher tolerance to large carnivores compared to non-  
426 conservancy members [71]. The Cederberg Conservancy was established in partnership with  
427 CapeNature in 1997 as a voluntary agreement between landowners. It currently consists of  
428 22 privately-owned properties and covers 755 km<sup>2</sup>, resulting in more viable habitat for leopards  
429 and their prey. The size of this conservancy could certainly be increased to the benefit of the  
430 leopard population.

431 Landscape connectivity between the various suitable-leopard habitats is another key  
432 aspect which will certainly impact the future of leopard conservation in the Cape. Anecdotal  
433 evidence suggests that at least some of the leopard ‘subpopulations’ within the Western Cape  
434 may be interconnected. This poses several important considerations to maintaining a  
435 genetically viable leopard population in the long term. We recommend future research to  
436 investigate the potential interconnectivity between leopards and corridor-networks utilized by  
437 leopards in the Western Cape, identifying the type of land use that leopard corridors fall in and  
438 whether these areas require protection. Ultimately, maintaining and potentially expanding  
439 buffer zones around protected areas and dispersal corridors among suitable leopard areas is  
440 key to the long-term sustainability of South Africa’s leopard populations [8].

441

## 442 **Conclusion**

443 Effectively conserving leopards in a human-dominated landscape requires a good  
444 understanding of population estimates. The robust statistical approaches used in our study  
445 are important as they provide accurate population estimates that can be used to make  
446 informed management and conservation decisions at both local and regional scales. Leopard  
447 densities and ranging behaviour in the Western Cape indicate that large tracts of protected  
448 land and connectivity of the landscape are essential requirements for the long-term survival of  
449 leopard populations [52], as well as increased efforts in conflict mitigation, especially during  
450 winter months. Since the majority of the remaining suitable leopard habitat falls within non-

451 protected areas, we suggest that conservation efforts should focus on privately-owned  
452 farmlands through the formation of conservancies.

453

## 454 **Acknowledgements**

455 We are very grateful to our donors, Abax Foundation, Bushmans Kloof Wilderness Reserve,  
456 Lomas Wildlife Protection Trust, and the Rolf Stephan Nussbaum Foundation. Without their  
457 support this work would not have been possible. We thank Ford Wildlife Foundation for  
458 providing a vehicle for the research team. A special thanks also to Rika du Plessis from Cape  
459 Nature and all Cederberg landowners for their support and providing us access to their  
460 properties. We acknowledge the Cape Leopard Trust for providing the resources to enable  
461 this research and the Scientific Advisory Board for their input during the design phase of this  
462 study. We thank Gareth Mann for his guidance on selecting good camera trap sites for  
463 leopards and his assistance with the Camerabase software. We thank Ewan Brennan, Hannes  
464 de Kok, Ismail Wambi, Lizette Burger, James Wells, and Grant Baker for assisting with the  
465 camera trap survey and MJ Grobler, Louw Redelinghuys, and Ockie Müller for assisting with  
466 the data processing. Finally, we want to thank Professor Dan Parker and Dr Alison Leslie for  
467 reviewing this manuscript.

468

### 469 **Author Contributions**

470 Conceptualization: LM

471 Funding acquisition: LM

472 Methodology design: LM, CL & RA

473 Data collection: LM, CL, BS

474 Data analysis: RA

475 Writing – original draft: LM, RA, WBL

476 Writing – review & editing: RA, CL, BS, WBL

477

## 478 **References**

- 479 1. Nowell K, Jackson P. Wild cats: status survey and conservation action plan. Gland:  
480 IUCN/SSC Cat Specialist Group; 1996 [Cited 2021 April 15]. Available from:  
481 <https://portals.iucn.org/library/node/6998>
- 482 2. Jacobson AP, Gerngross P, Lemeris Jr. JR, Schoonover RF, Anco C, Breitenmoser-  
483 Würsten C, et al. Leopard (*Panthera pardus*) status, distribution, and the research  
484 efforts across its range. *PeerJ*. 2016;4:e1974. <https://doi.org/10.7717/peerj.1974>
- 485 3. Stein AB, Athreya V, Gerngross P, Balme G, Henschel P, Karanth U, et al. *Panthera*  
486 *pardus* (amended version of 2019 assessment). The IUCN Red List of Threatened  
487 Species; 2020:e.T15954A163991139. [https://dx.doi.org/10.2305/IUCN.UK.2020-](https://dx.doi.org/10.2305/IUCN.UK.2020-1.RLTS.T15954A163991139.en)  
488 [1.RLTS.T15954A163991139.en](https://dx.doi.org/10.2305/IUCN.UK.2020-1.RLTS.T15954A163991139.en)
- 489 4. Kissui BM. Livestock predation by lions, leopards, spotted hyenas, and their vulnerability  
490 to retaliatory killing in the Maasai steppe, Tanzania. *Anim Conserv*. 2008;11: 422–432.  
491 <https://doi.org/10.1111/j.1469-1795.2008.00199.x>
- 492 5. Packer C, Brink H, Kissui BM, Maliti H, Kushnir H, Caro T. Effects of trophy hunting on  
493 lion and leopard populations in Tanzania. *Conserv Biol*. 2010; 25:142–153,  
494 <https://doi.org/10.1111/j.1523-1739.2010.01576.x>.
- 495 6. Ray JC, Hunter LTB, Zigouris J. Setting conservation and research priorities for larger  
496 African carnivores. WCS Working Paper No. 24. Wildlife Conservation Society, New  
497 York; 2005.
- 498 7. Swanepoel LH, Somers MJ, van Hoven W, Schiess-Meier M, Owen C, Snyman A, et al.  
499 Survival rates and causes of mortality of leopards *Panthera pardus* in southern Africa.  
500 *Oryx*. 2015;49: 595–603. <https://doi.org/10.1017/S0030605313001282>.
- 501 8. Swanepoel LH, Lindsey P, Somers MJ, Van Hoven W, Dalerum F. Extent and  
502 fragmentation of suitable leopard habitat in South Africa. *Anim Conserv*. 2013;16: 41–  
503 50. <https://doi.org/10.1111/j.1469-1795.2012.00566.x>
- 504 9. Shortridge GC. The mammals of South West Africa. London: Heinemann; 1934

- 505 10. Skead CJ. Historical mammal incidence in the Cape Province: The Western and  
506 Northern Cape Vol. 1. Cape Town: Cape Department of Nature & Environmental  
507 Conservation; 1980.
- 508 11. Martins QE. The ecology of the leopard *Panthera pardus* in the Cederberg Mountains.  
509 PhD thesis, University of Bristol; 2010 [Cited 2020 December 23]. Available from:  
510 <https://research-information.bris.ac.uk/ws/portalfiles/portal/34506234/535218.pdf>
- 511 12. Martins Q, Martins N. Leopards of the Cape: conservation and conservation concerns.  
512 *Int J Environ Stud*. 2006;63: 579–585. <https://doi.org/10.1080/00207230600963486>
- 513 13, Norton PM. Historical changes in the distribution of leopards in the Cape Province, South  
514 Africa. *Bontebok*. 1986;5: 1–9.
- 515 14. Devens CH, Hayward MW, Tshabalala T, Dickman A, McManus JS, Smuts B, et al.  
516 Estimating leopard density across the highly modified human-dominated landscape of  
517 the Western Cape, South Africa. *Oryx*. 2021;55: 34–45.  
518 <https://doi.org/10.1017/S0030605318001473>
- 519 15. Swanepoel LH, Balme G, Williams S, Power RJ, Snyman A, Gaigher I, et al. A  
520 conservation assessment of *Panthera pardus*. In: Child MF, Roxburgh L, Do Linh San  
521 E, Raimondo D, Davies-Mostert HT, editors. *The Red List of Mammals of South Africa,*  
522 *Swaziland and Lesotho*. South Africa: South African National Biodiversity Institute and  
523 Endangered Wildlife Trust; 2016.
- 524 16. Devens CH, Hayward MW, Tshabalala T, Dickman A, McManus JS, Smuts B, et al.  
525 Estimating leopard density across the highly modified human-dominated landscape of  
526 the Western Cape, South Africa. *Oryx*; 2018; 1–12.  
527 <https://doi.org/10.1017/S0030605318001473>.
- 528 17. Balme GA, Slotow R, Hunter LTB. Edge effects and the impact of non-protected areas in  
529 carnivore conservation: leopards in the Phinda–Mkhuze Complex, South Africa. *Anim*  
530 *Conserv*. 2010;13: 315–323. <https://doi.org/10.1111/j.1469-1795.2009.00342.x>

- 531 18. Karanth KU, Nichols JD. Monitoring tigers and their prey: a manual for researchers,  
532 managers and conservationists in tropical Asia. Bangalore: Centre for Wildlife Studies;  
533 2002.
- 534 19. Martin RB, de Meulenaer T. Survey of the status of the leopard (*Panthera pardus*) in  
535 sub-Saharan Africa. Lausanne: CITES Secretariat; 1988.
- 536 20. Myers N. The leopard *Panthera pardus* in Africa. Morges: IUCN Monograph No. 5; 1976  
537 [Cited 2021 April 2]. Available from:  
538 [http://www.catsg.org/fileadmin/files/3.Conservation\\_Center/3.2.\\_Status\\_Reports/  
539 leopard/Myers\\_1976\\_The\\_Leopard\\_in\\_Africa.pdf](http://www.catsg.org/fileadmin/files/3.Conservation_Center/3.2._Status_Reports/leopard/Myers_1976_The_Leopard_in_Africa.pdf)
- 540 21. Norton P. How many leopards? A criticism of Martin and de Meulenaer's population  
541 estimates for Africa. *S Afr J Sci.* 1990;86: 218–220.
- 542 22. Chapman S, Balme G. An estimate of leopard population density in a private reserve in  
543 KwaZulu-Natal, South Africa, using camera-traps and capture–recapture models. *S Afr  
544 J Wildl Res.* 2010;40: 114–120. <https://doi.org/10.3957/056.040.0202>
- 545 23. Hayward MW, Boitani L, Burrows ND, Funston PJ, Karanth KU, MacKenzie DI, et al.  
546 Ecologists need robust survey designs, sampling and analytical methods. *J Appl Ecol.*  
547 2015;52: 286–290. <https://doi.org/10.1111/1365-2664.12408>
- 548 24. Trouwborst A, Loveridge AJ, Macdonald DW. Spotty data: managing international  
549 leopard (*Panthera pardus*) trophy hunting quotas amidst uncertainty. *J Environ Law.*  
550 2020;32: 253–278. <https://doi.org/10.1093/jel/eqz032>
- 551 25. Allen ML, Wang S, Olson LO, Li Q, Krofel M. Counting cats for conservation: seasonal  
552 estimates of leopard density and drivers of distribution in the Serengeti. *Biodivers  
553 Conserv.* 2020;29: 3591–3608. <https://doi.org/10.1007/s10531-020-02039-w>
- 554 26. Balme GA, Lindsey PA, Swanepoel LH, Hunter LTB. Failure of research to address the  
555 rangewide conservation needs of large carnivores: leopards in South Africa as a case  
556 study. *Conserv Lett.* 2014;7: 3–11. <https://doi.org/10.1111/conl.12028>
- 557 27. Norton PM, Henley SR. Home range and movements of male leopards in the Cederberg  
558 Wilderness Area, Cape Province. *S Afr J Wildl Res.* 1987;17, 41–48.

- 559 28. Stuart CT, Stuart MD. Cederberg leopard monitoring project report. Nieuwoudtville:  
560 African Carnivore Survey; 1991.
- 561 29. Martins Q, Harris S. Movement, activity and hunting behaviour of leopards in the  
562 Cederberg mountains, South Africa. *Afr J Ecol.* 2013;51: 571–579.  
563 <https://doi.org/10.1111/aje.12068>
- 564 30. Van Rooyen G, Steyn H. Cederberg: Clanwilliam and Biedouw Valley: South African  
565 Wild Flower Guide 10. Cape Town: Botanical Society of South Africa; 2004
- 566 31. Martins Q, Horsnell WGC, Titus W, Rautenbach T, Harris S. Diet determination of the  
567 Cape Mountain leopards using global positioning system location clusters and scat  
568 analysis. *J Zool.* 2011;283: 81–87. <https://doi.org/10.1111/j.1469-7998.2010.00757>.
- 569 32. Rautenbach T. Assessing the diet of the Cape leopard (*Panthera pardus*) in the  
570 Cederberg and Gamka mountains, South Africa. MSc thesis, Nelson Mandela  
571 Metropolitan University; 2010 [Cited 2021 January 30]. Available from:  
572 [https://vital.seals.ac.za/vital/access/manager/Repository/vital:10699?site\\_name=Globa](https://vital.seals.ac.za/vital/access/manager/Repository/vital:10699?site_name=Globa)  
573 [IView&view=null&f1=sm\\_type%3A%22Thesis%22&sort=ss\\_dateNormalized+asc%2Cs](https://vital.seals.ac.za/vital/access/manager/Repository/vital:10699?site_name=GlobalView&view=null&f1=sm_type%3A%22Thesis%22&sort=ss_dateNormalized+asc%2Cs)  
574 [ort\\_ss\\_title+asc&f2=sm\\_citation\\_publication\\_date%3A%222010%22](https://vital.seals.ac.za/vital/access/manager/Repository/vital:10699?site_name=GlobalView&view=null&f1=sm_type%3A%22Thesis%22&sort=ss_dateNormalized+asc%2Cs)
- 575 33. Tobler MW. Camera Base, version 1.3. Botanical Research Institute of Texas; 2007.
- 576 34. Crall JP, Stewart CV, Berger-Wolf TY, Rubenstein DI, Sundaresan SR. HotSpotter—  
577 patterned species instance recognition. Florida: Institute of Electrical and Electronics  
578 Engineers; 2013.
- 579 35. Linkie M, Ridout MS. Assessing tiger-prey interactions in Sumatran rainforests. *J Zool.*  
580 2011;284: 224–229. <https://doi.org/10.1111/j.1469-7998.2011.00801.x>
- 581 36. Fattebert J, Balme GA, Robinson HS, Dickerson, Slotow R, Hunter LTB. Population  
582 recovery highlights spatial organization dynamics in adult leopards. *J Zool.* 2016;299:  
583 153–162. <https://doi.org/10/1111/jzo.12344>
- 584 37. Sandell M. The mating tactics and spacing patterns of solitary carnivores. In: Gittleman  
585 JL, editor. *Carnivore behavior, ecology, and evolution*. Ithaca: Cornell University Press;  
586 1989. pp.164-182.

- 587 38. Royle JA, Nichols JD, Karanth KU, Gopalaswamy AM. A hierarchical model for  
588 estimating density in camera-trap studies. *J Appl Ecol.* 2009;46: 118–127.  
589 <https://doi.org/10.1111/j.1365-2664.2008.01578.x>
- 590 39. Sollmann R, Furtado MM, Gardner B, Hofer H, Jácomo AT, Tôrres NM, Silveira L.  
591 Improving density estimates for elusive carnivores: accounting for sex-specific  
592 detection and movements using spatial capture–recapture models for jaguars in  
593 central Brazil. *Biol conserve.* 2011;144: 1017–1024.  
594 <https://doi.org/10.1016/j.biocon.2010.12.01>
- 595 40. R Development Core Team. R: a language and environment for statistical computing.  
596 Vienna: R Foundation for Statistical Computing; 2021.
- 597 41. Gelman A, Carlin JB, Stern HS, Rubin DB. Bayesian data analysis. New York: Chapman  
598 & Hall; 2004.
- 599 42. Gelman A, Hill J. Data analysis sing regression and multilevel/hierarchical models.  
600 Cambridge: Cambridge University Press; 2006.  
601 <https://doi.org/10.1017/CBO9780511790942>
- 602 43. Royle JA, Chandler RB, Sollmann R, Gardner B. Spatial capture-recapture. 1st ed.  
603 Massachusetts: Academic Press; 2013.
- 604 44. MacKenzie DI, Nichols JD, Royle JA, Pollock KH, Bailey LL, Hines JE. Occupancy  
605 estimation and modeling. Inferring patterns and dynamics of species occurrence.  
606 Burlington: Academic Press; 2006.
- 607 45. Plummer M. JAGS: a program for analysis of Bayesian graphical models using gibbs  
608 sampling. In Proceedings of the 3rd International Workshop on Distributed Statistical  
609 Computing; 2003 [Cited 2021 January 30]. Available from: [http://www.ci.  
610 tuwien.ac.at/Conferences/DSC-2003/Drafts/Plummer.pdf/](http://www.ci.tuwien.ac.at/Conferences/DSC-2003/Drafts/Plummer.pdf/).
- 611 46. R Development Core Team. R: a language and environment for statistical computing.  
612 Vienna: R Foundation for Statistical Computing; 2019.
- 613 47. Plummer M. rjags: bayesian graphical models using MCMC. R package version 3–13;  
614 2014. Available from: <http://CRAN.R-project.org/package=rjags>.

- 615 48. Kéry M, Schaub M. Bayesian population analysis using WinBUGS: a hierarchical  
616 perspective. Boston: Academic Press; 2012.
- 617 49. Royle JA, Chandler RB, Sun CC, Fuller AK. Integrating resource selection information  
618 with spatial capture-recapture. *Methods Ecol Evol.* 2013;4: 520–530.  
619 <http://doi:10.1111/2041-210X.12039>
- 620 50. Mann G. Aspects of the ecology of leopards (*Panthera pardus*) in the Little Karoo, South  
621 Africa. PhD thesis, Rhodes University; 2014 [Cited 2021 January 4]. Available from:  
622 <https://core.ac.uk/download/pdf/145047034.pdf>
- 623 51. Stander PE, Haden PJ, Kagece, Ghau. The ecology of asociality in Namibian leopards. *J*  
624 *Zool.* 1997;242: 343–364. <https://doi.org/10.1111/j.1469-7998.1997.tb05806.x>
- 625 52. Marker LL, Dickman AJ. Factors affecting leopard (*Panthera pardus*) spatial ecology,  
626 with particular reference to Namibian farmlands. *S Afr J Wildl Res.* 2005;35: 105–115.  
627 <https://hdl.handle.net/10520/EJC117223>
- 628 53. Hayward MW, O'Brien J, Kerley GIH. Carrying capacity of large African predators:  
629 predictions and tests. *Biol Conserv.* 2007;139: 219–229.  
630 <https://doi.org/10.1016/j.biocon.2007.06.018>
- 631 54. Ramesh T, Kalle R, Rosenlund H, Downs CT. Low leopard populations in protected  
632 areas of Maputaland: a consequence of poaching, habitat condition, abundance of  
633 prey, and a top predator. *Ecol Evol.* 2017;7: 1964–1973.  
634 <https://doi.org/10.1002/ece3.2771>
- 635 55. Abade L, Cusack J, Moll RJ, Strampelli P, Dickman AJ, Macdonald DW, et al. Spatial  
636 variation in leopard (*Panthera pardus*) site use across a gradient of anthropogenic  
637 pressure in Tanzania's Ruaha landscape. *PLoS ONE.* 2018;13: e0204370.  
638 <https://doi.org/10.1371/journal.pone.0204370>
- 639 56. Havmøller RW, Tenan S, Scharff N, Rovero F. Reserve size and anthropogenic  
640 disturbance affect the density of an African leopard (*Panthera pardus*) meta-  
641 population. *PLoS ONE.* 2019;14: e0209541.  
642 <https://doi.org/10.1371/journal.pone.0209541>



- 643 57. Stuart CT, Macdonald IAW, Mills MGL. History, current status and conservation of large  
644 mammalian predators in Cape Province, Republic of South Africa. *Biol Conserv.*  
645 1985;31: 7–19. [https://doi.org/10.1016/0006-3207\(85\)90031-X](https://doi.org/10.1016/0006-3207(85)90031-X)
- 646 58. Castley JG, Knight MH, Mills MGL, Thouless C. Estimation of the lion (*Panthera leo*)  
647 population in the southwestern Kgalagadi Transfrontier Park using a capture–  
648 recapture survey. *Afr Zool.* 2002;37: 27–34.  
649 <https://doi.org/10.1080/15627020.2002.11657151>
- 650 59. Loveridge AJ, Searle AW, Murindagomo F, Macdonald DW. The impact of sport-hunting  
651 on the population dynamics of an African lion population in a protected area. *Biol*  
652 *Conserv.* 2007;134: 548–558. <https://doi.org/10.1016/j.biocon.2006.09.010>
- 653 60. Constant NL, Bell S, Hill RA. The impacts, characterisation and management of human-  
654 leopard conflict in a multi-use land system in South Africa. *Biodivers Conserv.*  
655 2015;24: 2967–2989. <https://doi.org/10.1007/s10531-015-0989-2>
- 656 61. Balme GA, Batchelor A, De Woronin Britz N, Seymour G, Grover M, Hes L, et al.  
657 Reproductive success of female leopards *Panthera pardus*: the importance of top-  
658 down processes. *Mamm Rev.* 2013;43: 221–237. <https://doi.org/10.1111/j.1365-2907.2012.00219.x>
- 660 62. Stuart CT. Notes on the mammalian carnivores of the Cape Province, South Africa.  
661 *Bontebok.* 1981;1: 1–58.
- 662 63. Ogada MO, Woodroffe R, Oguge NO, Frank LG. Limiting depredation by African  
663 carnivores: the role of livestock husbandry. *Conserv Biol.* 2003;17: 1521–1530.  
664 <https://doi.org/10.1111/j.1523-1739.2003.00061.x>
- 665 64. Miller JRB, Stoner KJ, Cejtin MR, Meyer TK, Middleton AD, Schmitz OJ. Effectiveness of  
666 contemporary techniques for reducing livestock depredations by large carnivores. *Wildl*  
667 *Soc Bull.* 2016;40: 806–815. <https://doi.org/10.1002/wsb.720>  
668 <https://doi.org/10.1016/j.jnc.2019.125738>
- 669 65. Rosenblatt E, Creel S, Becker MS, Merkle J, Mwape H, Schuette P, et al. Effects of a  
670 protection gradient on carnivore density and survival: an example with leopards in the

- 671 Luangwa valley, Zambia. *Ecol Evol.* 2016;6: 3772–3785.  
672 <https://doi.org/10.1002/ece3.2155>
- 673 66. Nieman WA, Leslie AJ, Wilkinson A, Wossler TC. Socioeconomic and biophysical  
674 determinants of wire-snare poaching incidence and behaviour in the Boland region of  
675 South Africa. *J Nat Conserv.* 2019;52: 125738.
- 676 67. Williams ST, Williams KS, Lewis BP, Hill RA. Population dynamics and threats to an  
677 apex predator outside protected areas: implications for carnivore management. *R Soc*  
678 *Open Sci.* 2017;4: 161090. <https://dx.doi.org/10.1098/rsos.161090>.
- 679 68. Balme GA, Hunter LTB, Slotow R. Evaluating methods for counting cryptic carnivores. *J*  
680 *Wildl Manag.* 2009;73: 433–441. <https://doi.org/10.2193/2007-368>
- 681 69. Woodroffe R, Ginsberg JR. Edge effects and the extinction of populations inside  
682 protected areas. *Science.* 1998;280: 2126–2128.  
683 <https://doi.org/10.1126/science.280.5372.2126>
- 684 70. Lindsey PA, Romañach SS, Davies-Mostert HT. The importance of conservancies for  
685 enhancing the value of game ranch land for large mammal conservation in southern  
686 Africa. *J Zool.* 2009;277: 99–105. <https://doi.org/10.1111/j.1469-7998.2008.00529.x>
- 687 71. Schumann M, Watson LH, Schumann BD. Attitudes of Namibian commercial farmers  
688 toward large carnivores: The influence of conservancy membership. *S Afr J Wildl Res.*  
689 2008;38: 123–132. <https://doi.org/10.3957/0379-4369-38.2.123>

**Table 1. Estimates of Bayesian spatial capture recapture model parameters. Sigma is the ranging scale parameter.**

| Season | Density (95% CI) per 100 km <sup>2</sup> | Adult female adult density (95% CI) per 100 km <sup>2</sup> | Adult male density (95% CI) per 100 km <sup>2</sup> | Sigma (95% CI) (km)                                              | Population size (95% CI) |
|--------|------------------------------------------|-------------------------------------------------------------|-----------------------------------------------------|------------------------------------------------------------------|--------------------------|
| Summer | 1.62<br>(1.25 – 2.01)                    | 1.14<br>(0.80 – 1.53)                                       | 0.48<br>(0.34 – 0.63)                               | Female: 2.49<br>(2.21 – 2.78)<br><br>Male: 4.92<br>(4.51 – 5.33) | 113<br>(87 – 140)        |
| Winter | 1.53<br>(1.18 – 1.89)                    | 1.08<br>(0.75 – 1.43)                                       | 0.45<br>(0.36 – 0.55)                               | Female: 3.11<br>(2.6 – 3.67)<br><br>Male: 6.74<br>(6 – 7.5)      | 107<br>(82 – 132)        |

bioRxiv preprint doi: <https://doi.org/10.1101/2021.07.23.453562>; this version posted July 23, 2021. The copyright holder for this preprint (which was not certified by peer review) is the author/funder, who has granted bioRxiv a license to display the preprint in perpetuity. It is made available under aCC-BY 4.0 International license.

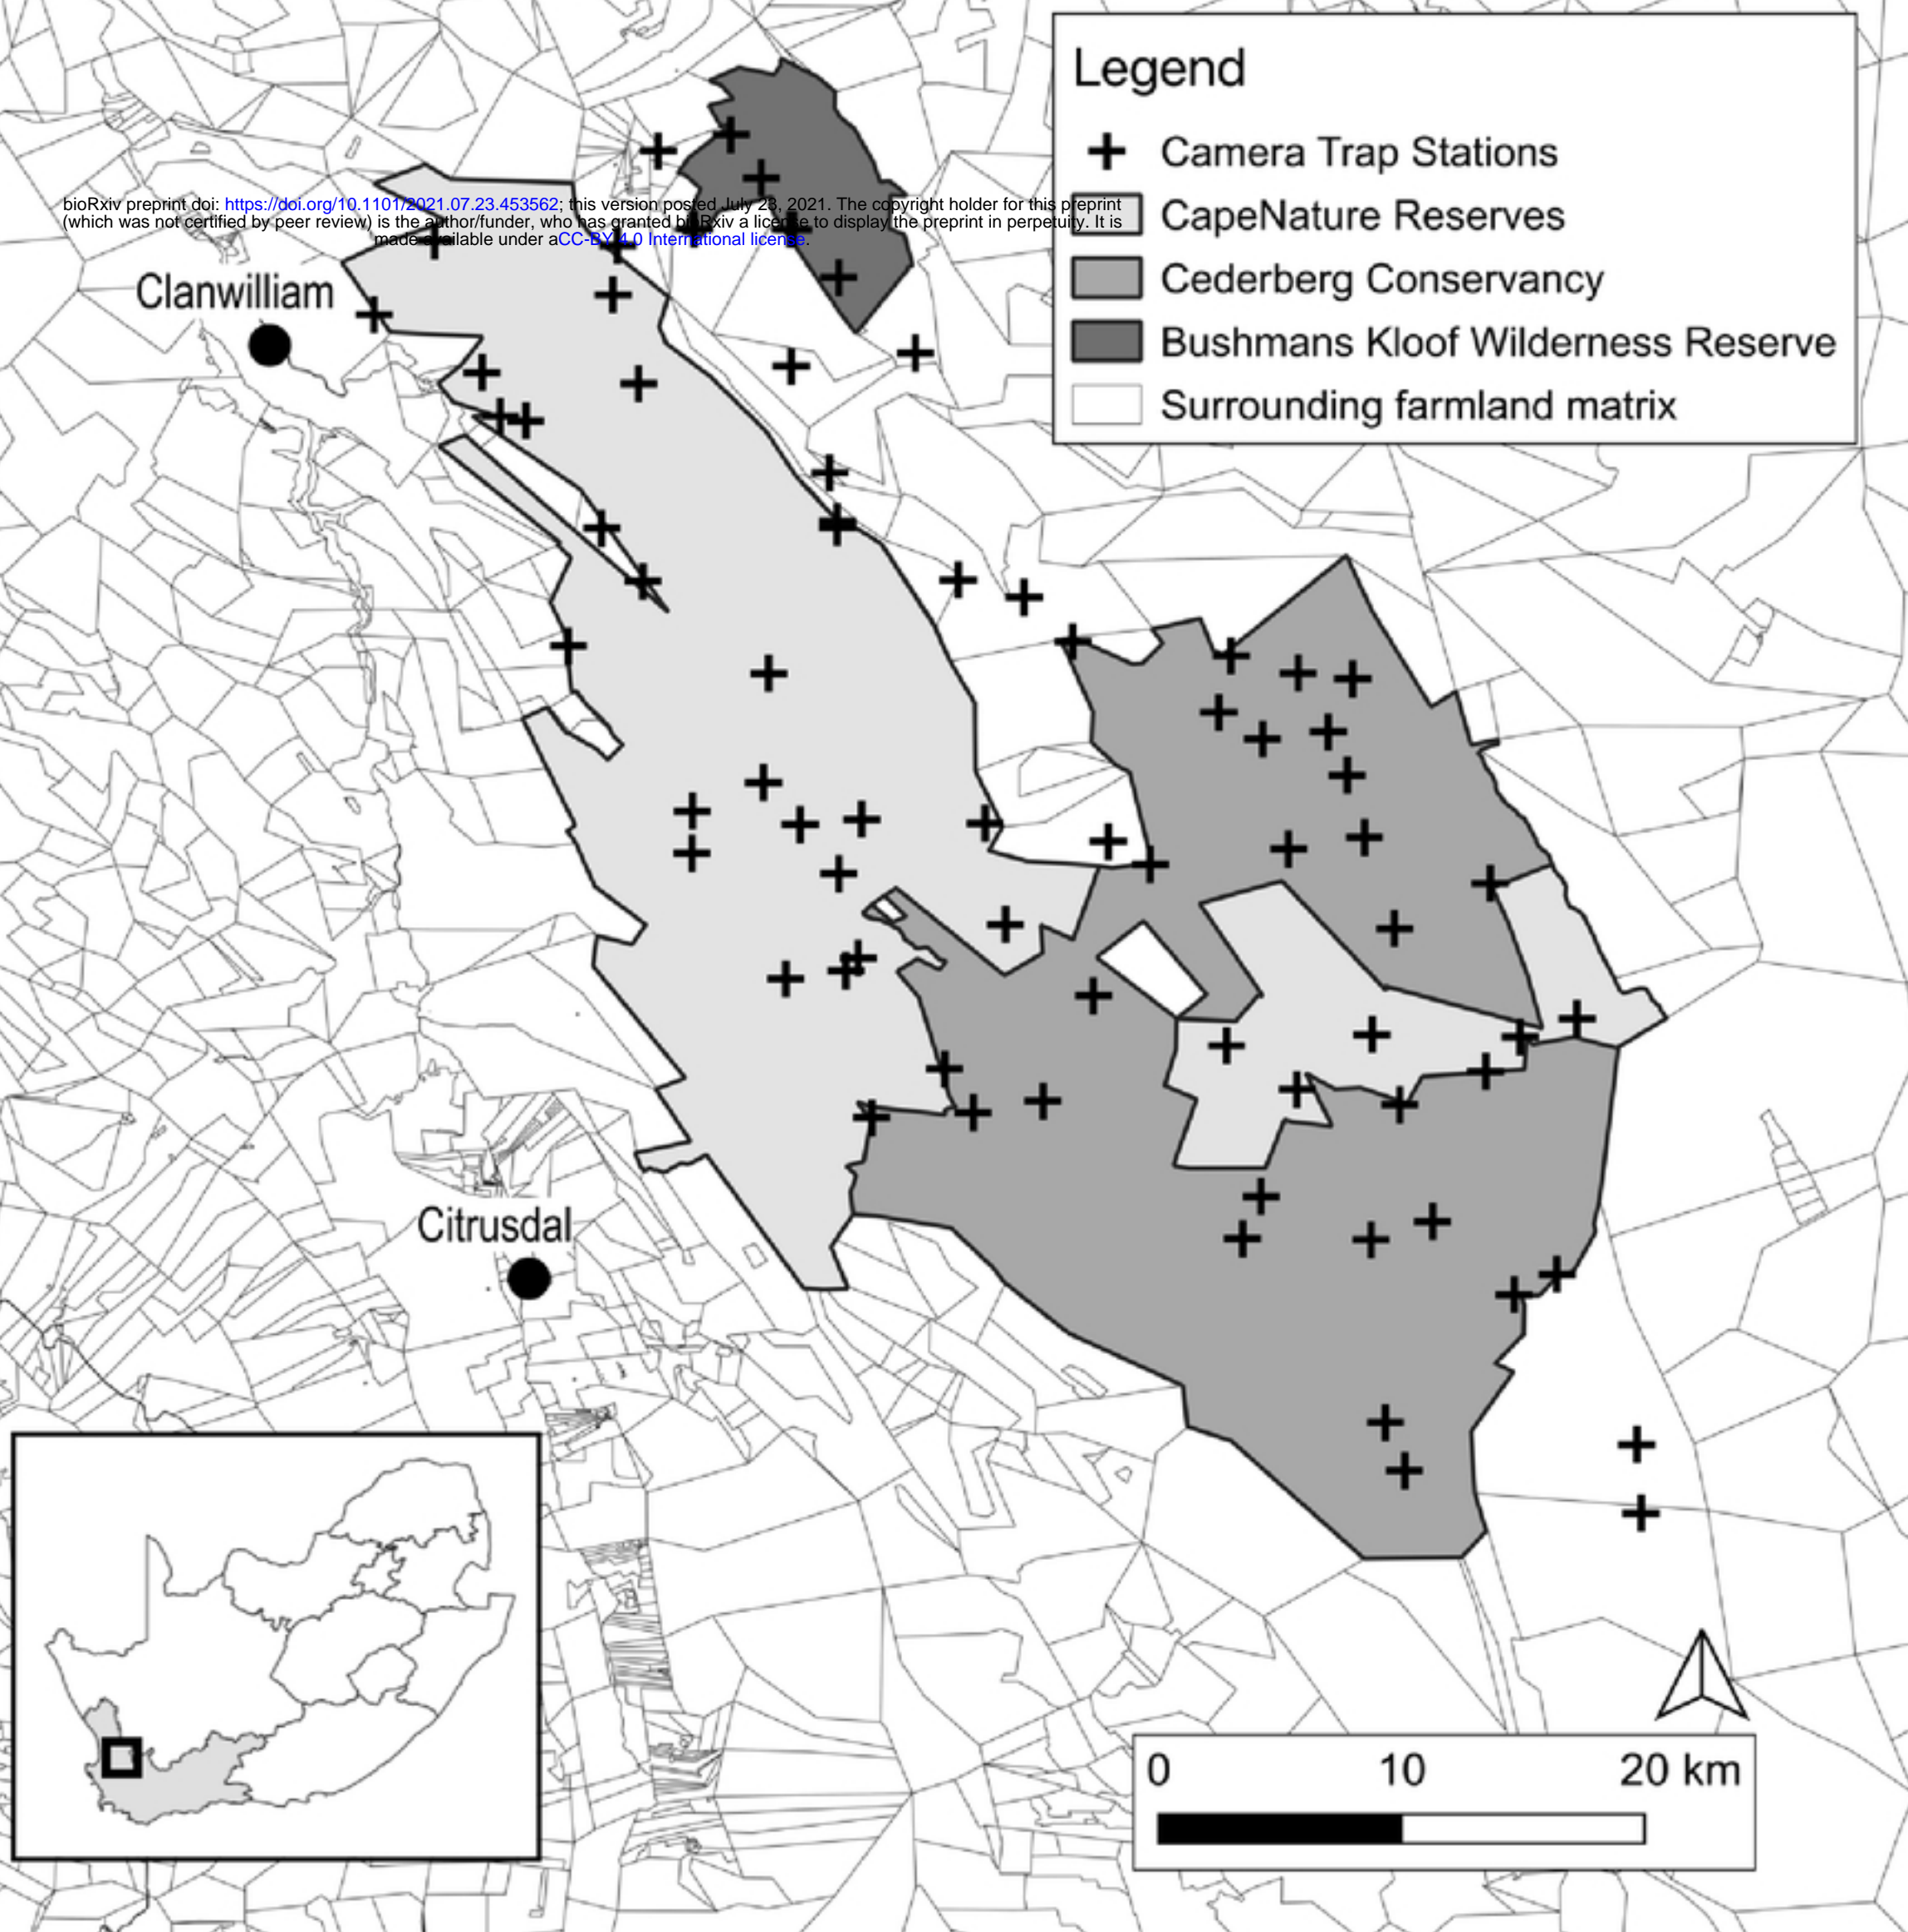

Fig 1. Camera trap sampling locations (n = 73) within the Cederberg

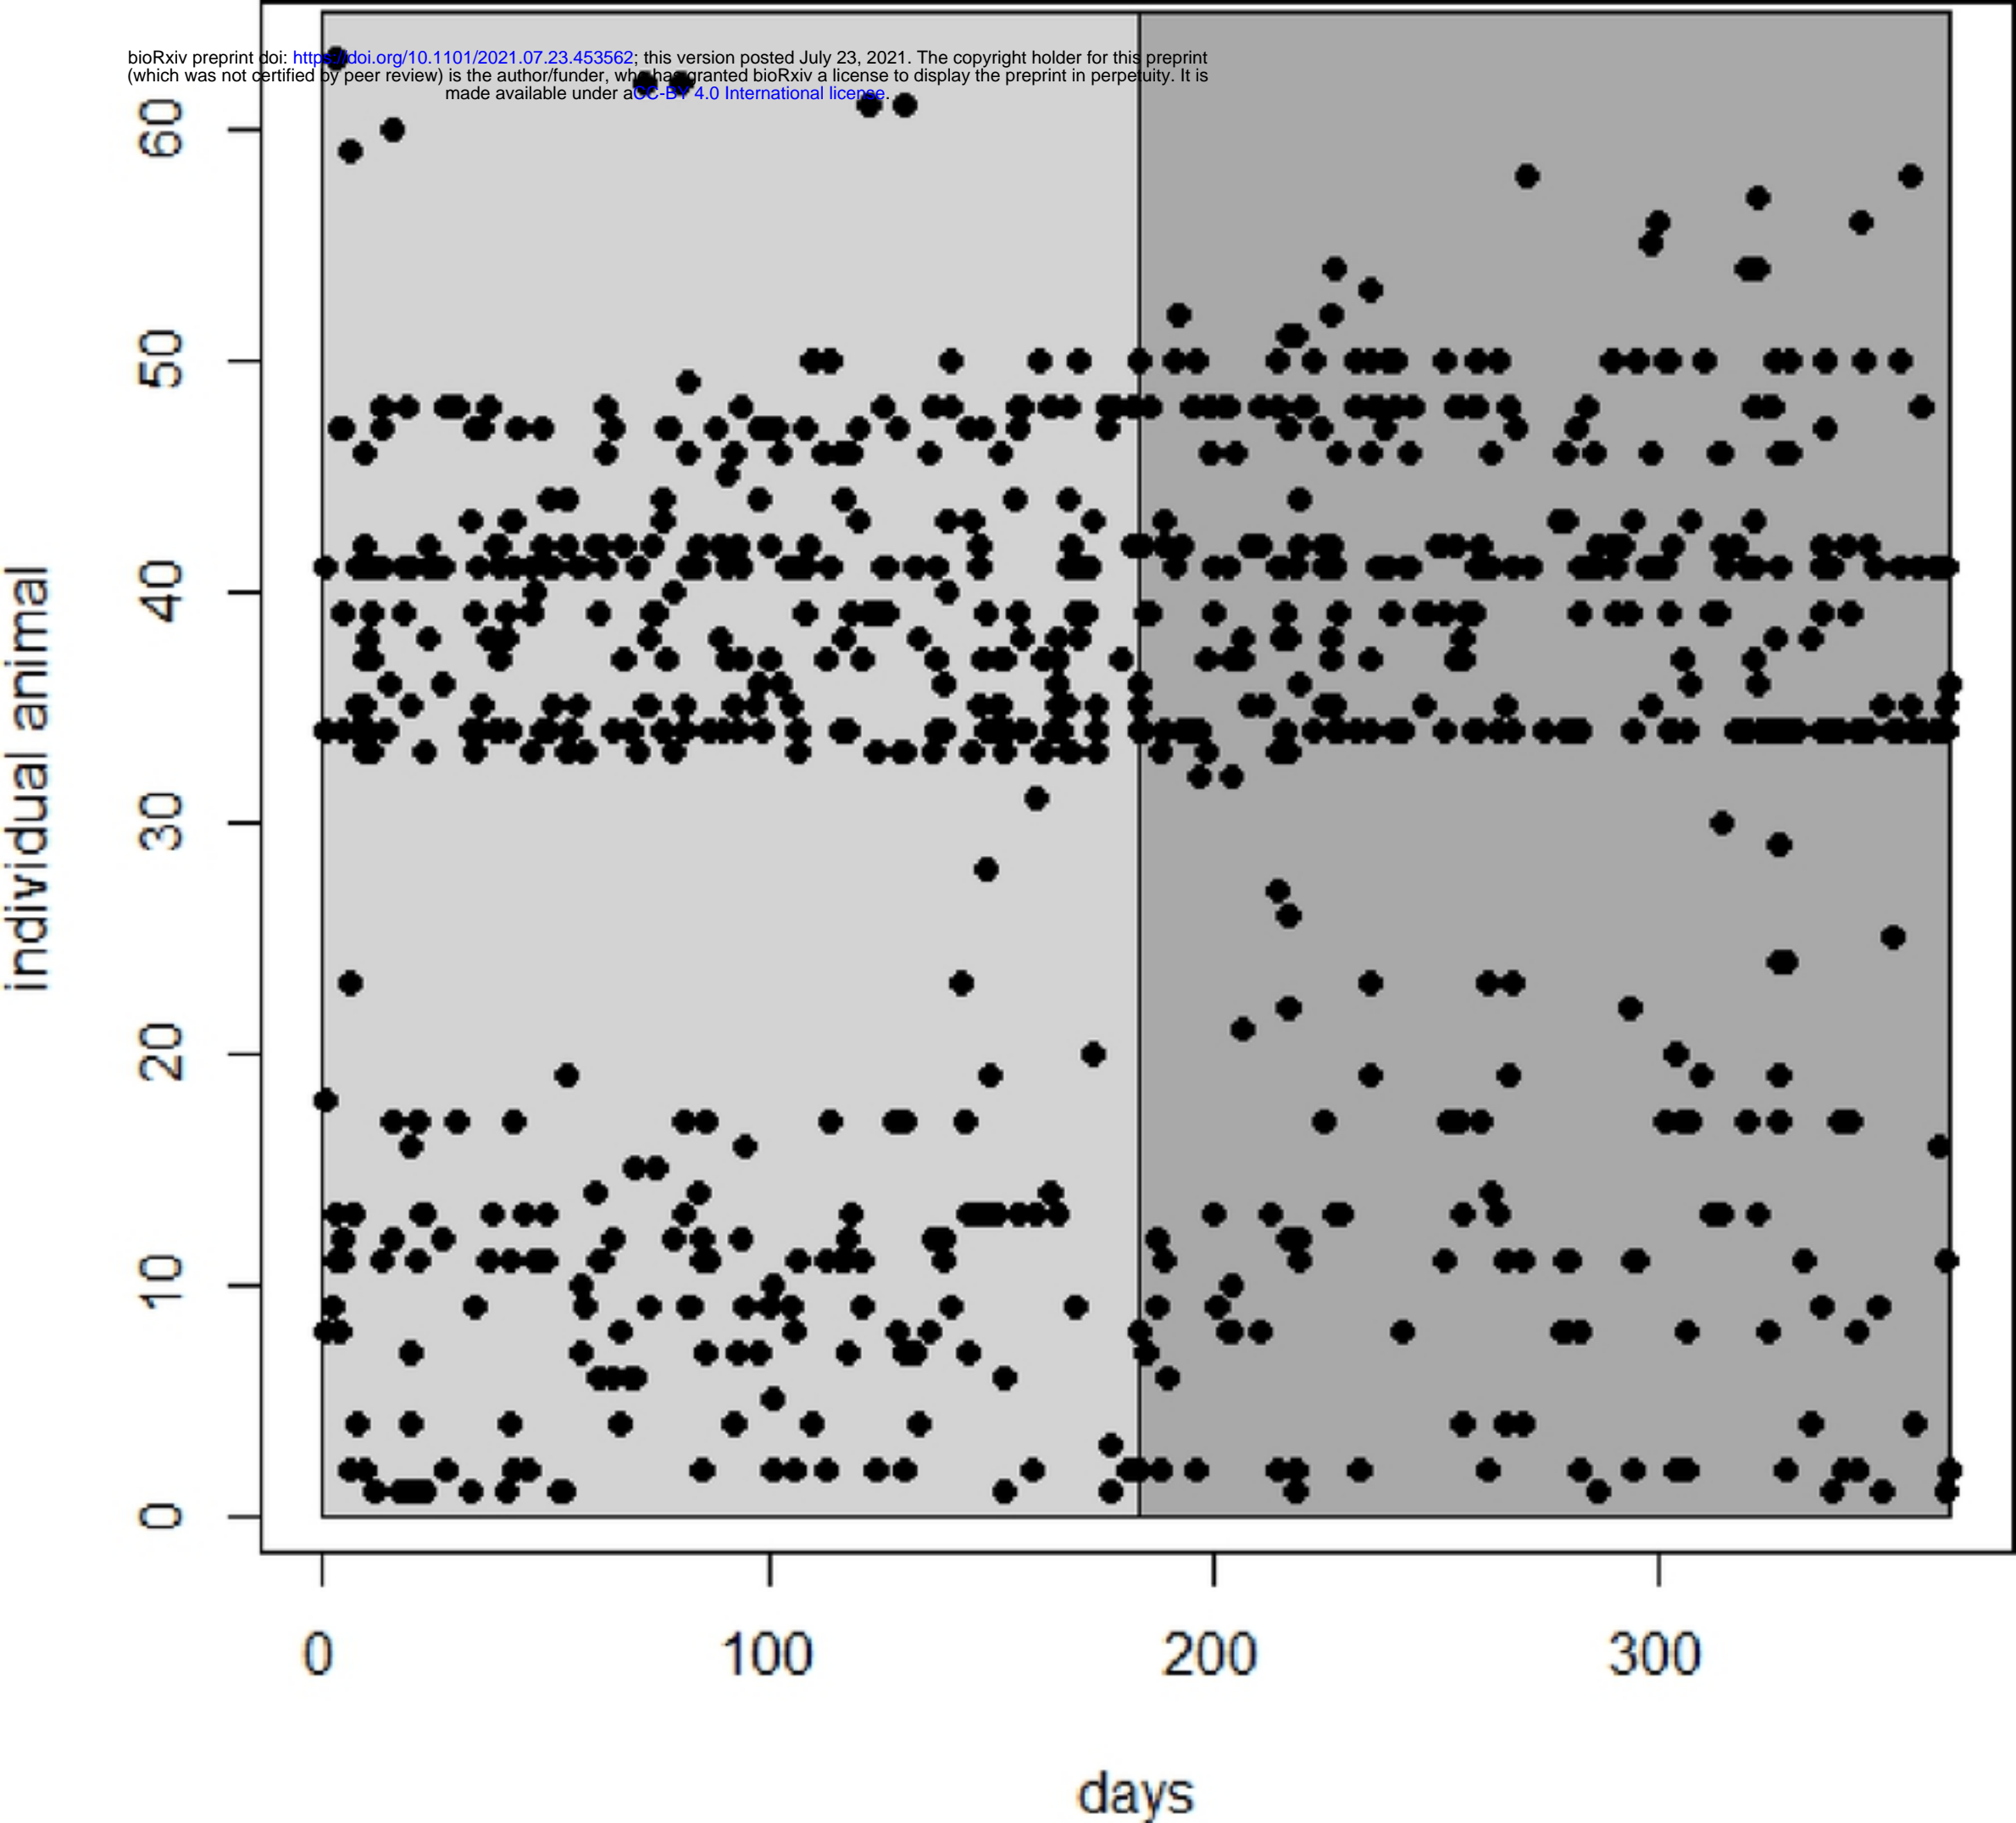

Fig 2. Individual leopard detections over the summer (light grey)

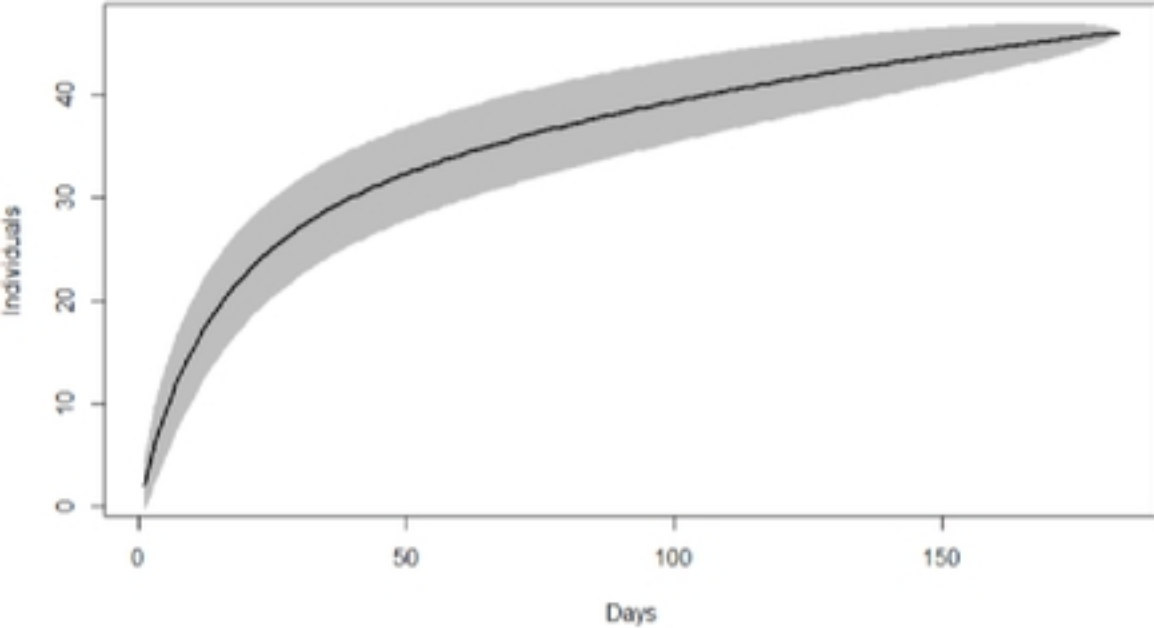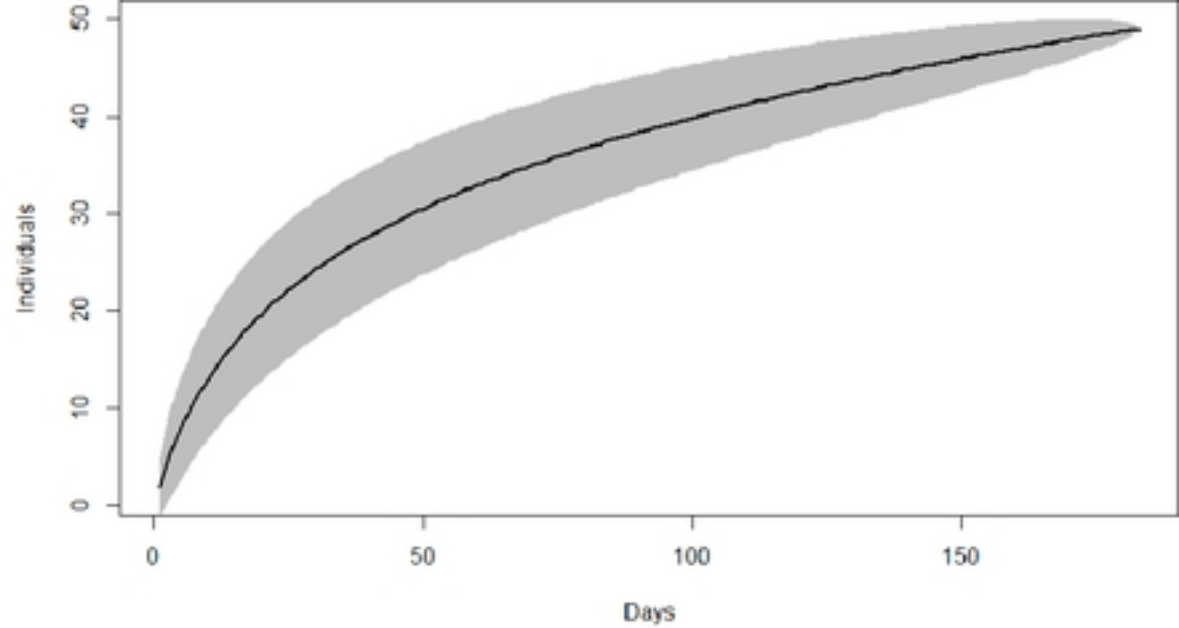

Fig 3. Accumulation curve for individual leopards for summer (le

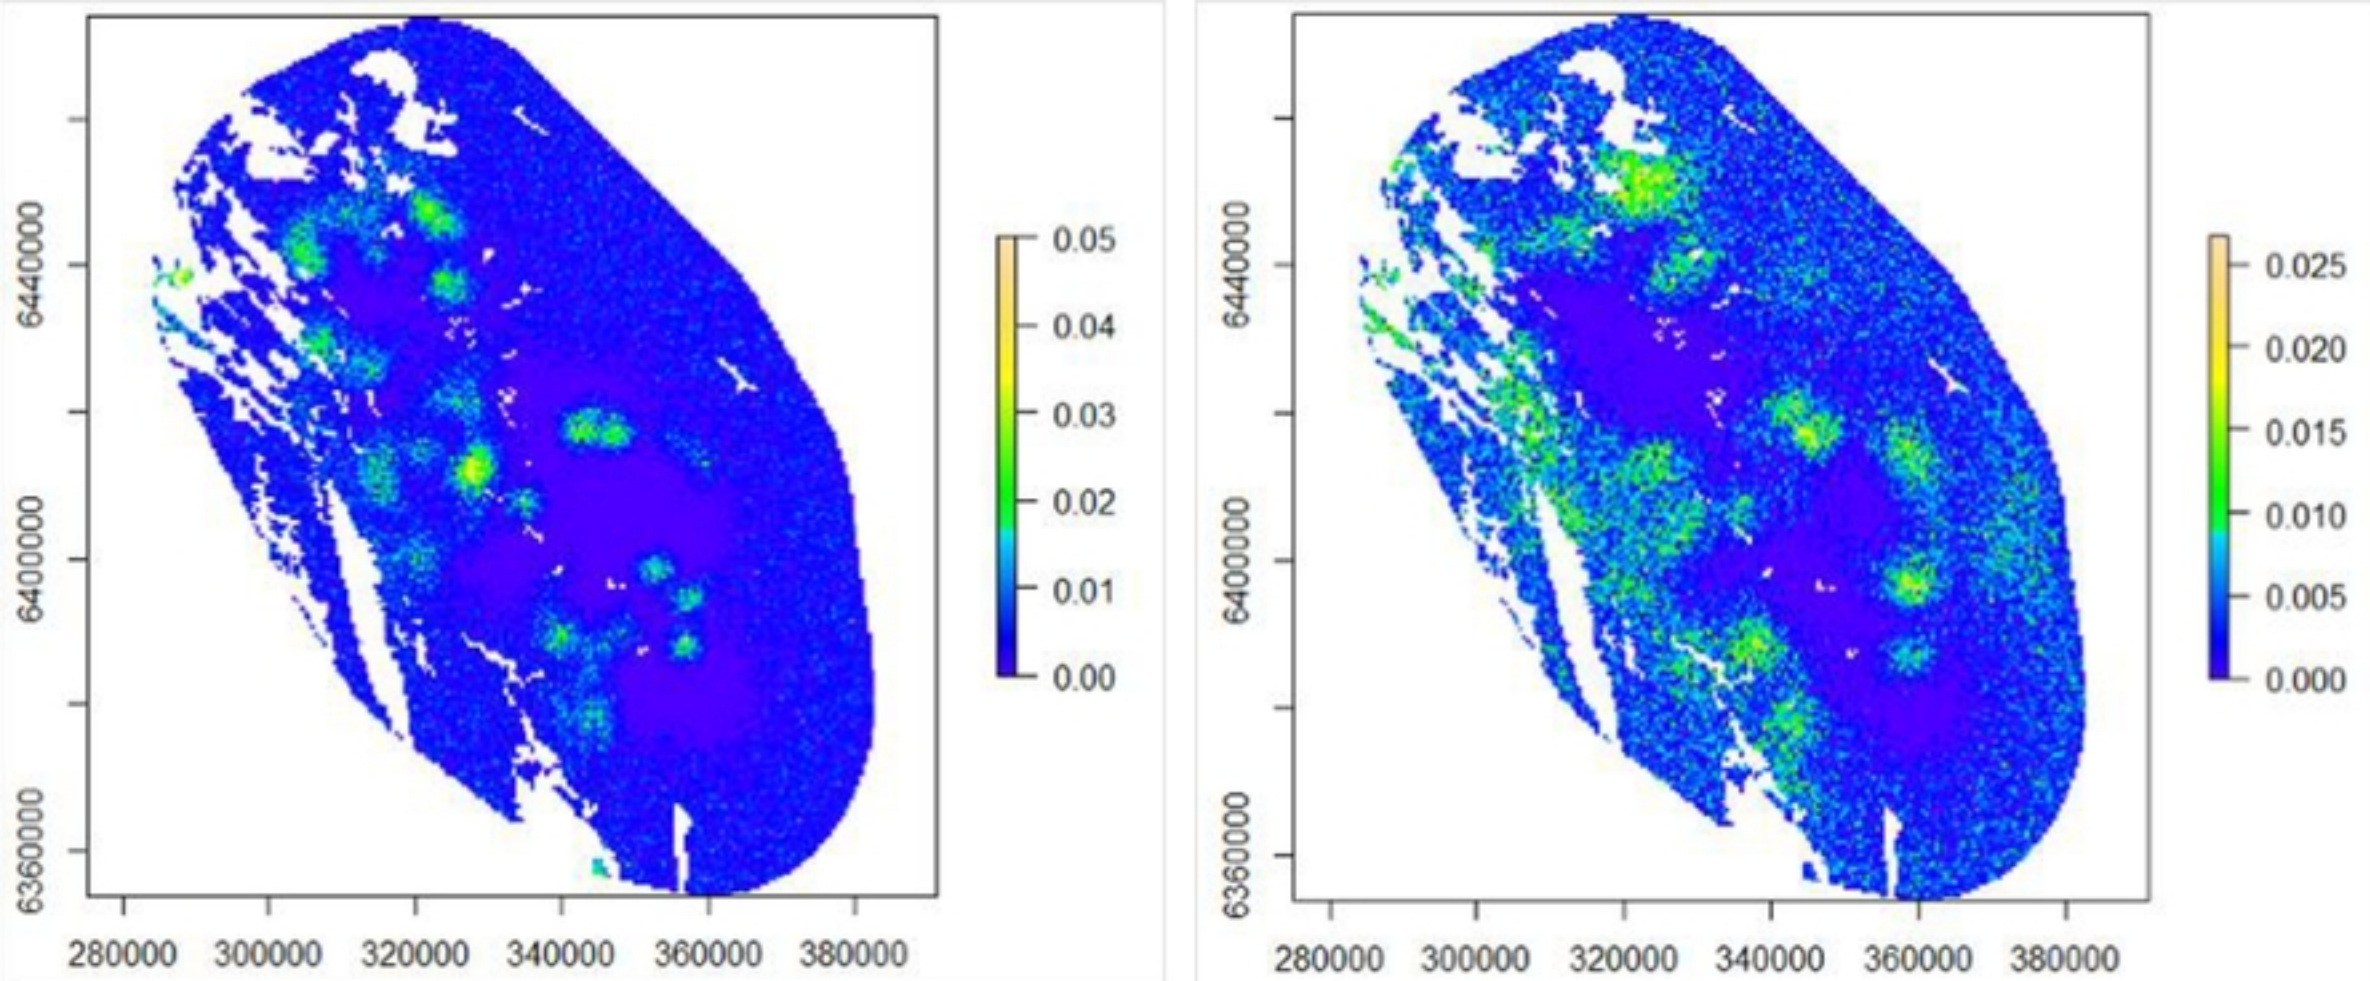

Fig 4. Expected density of individual leopards (individuals/km<sup>2</sup>) p

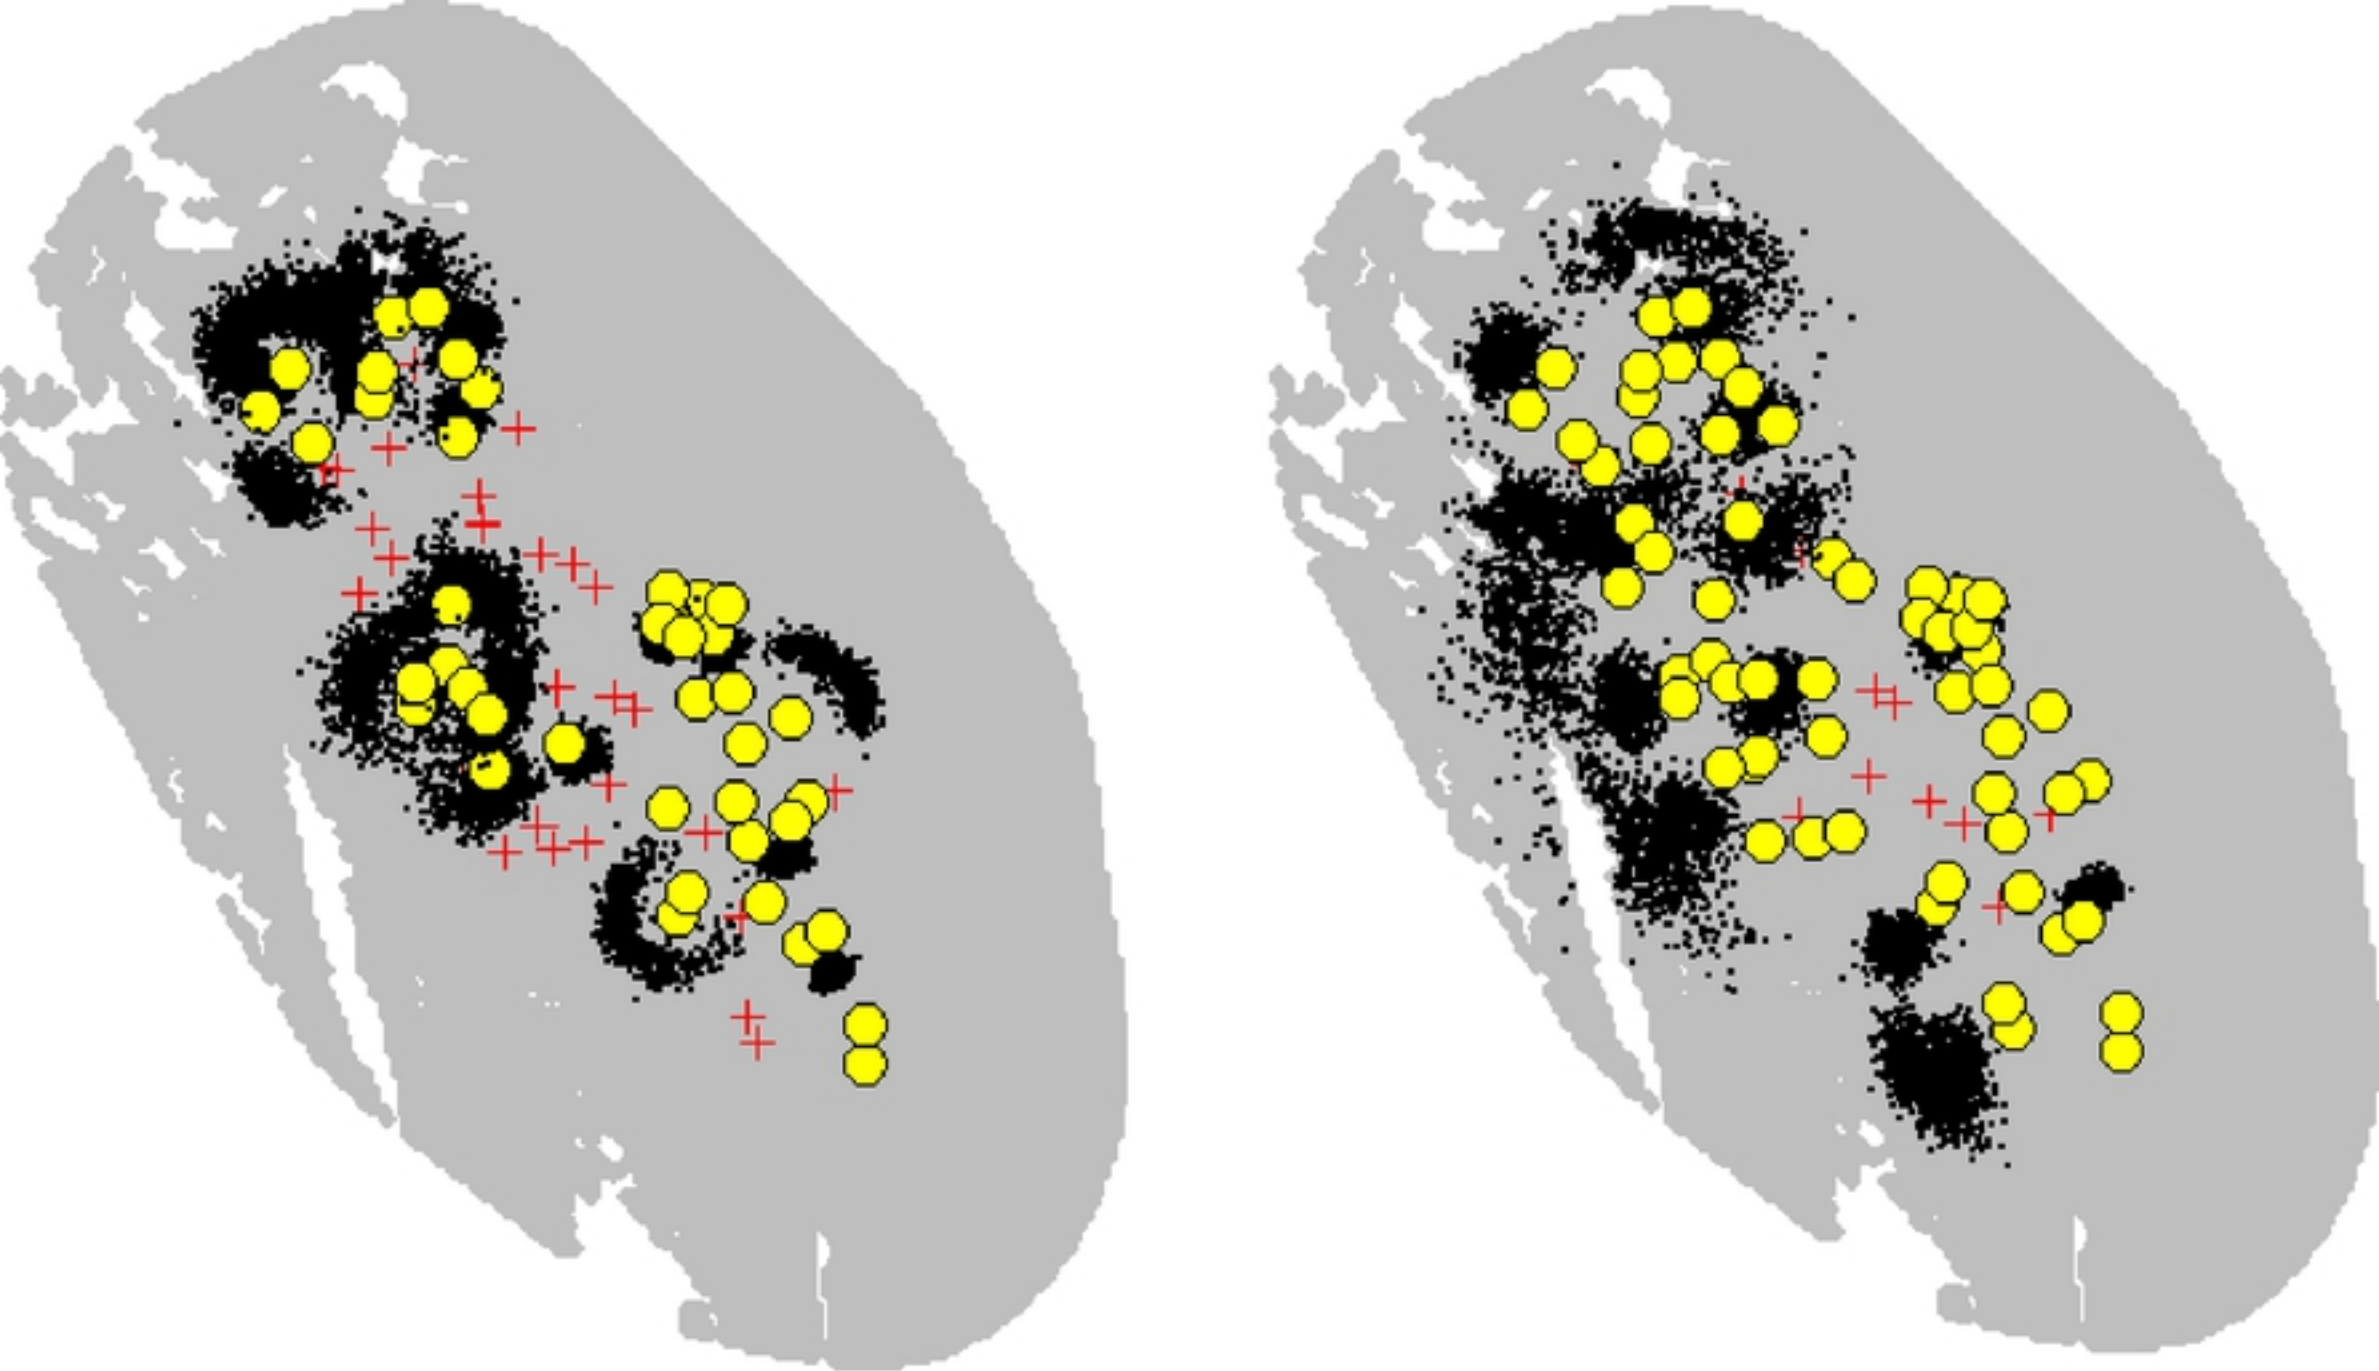

Fig 5. Activity centre posterior distributions (black dots); capture



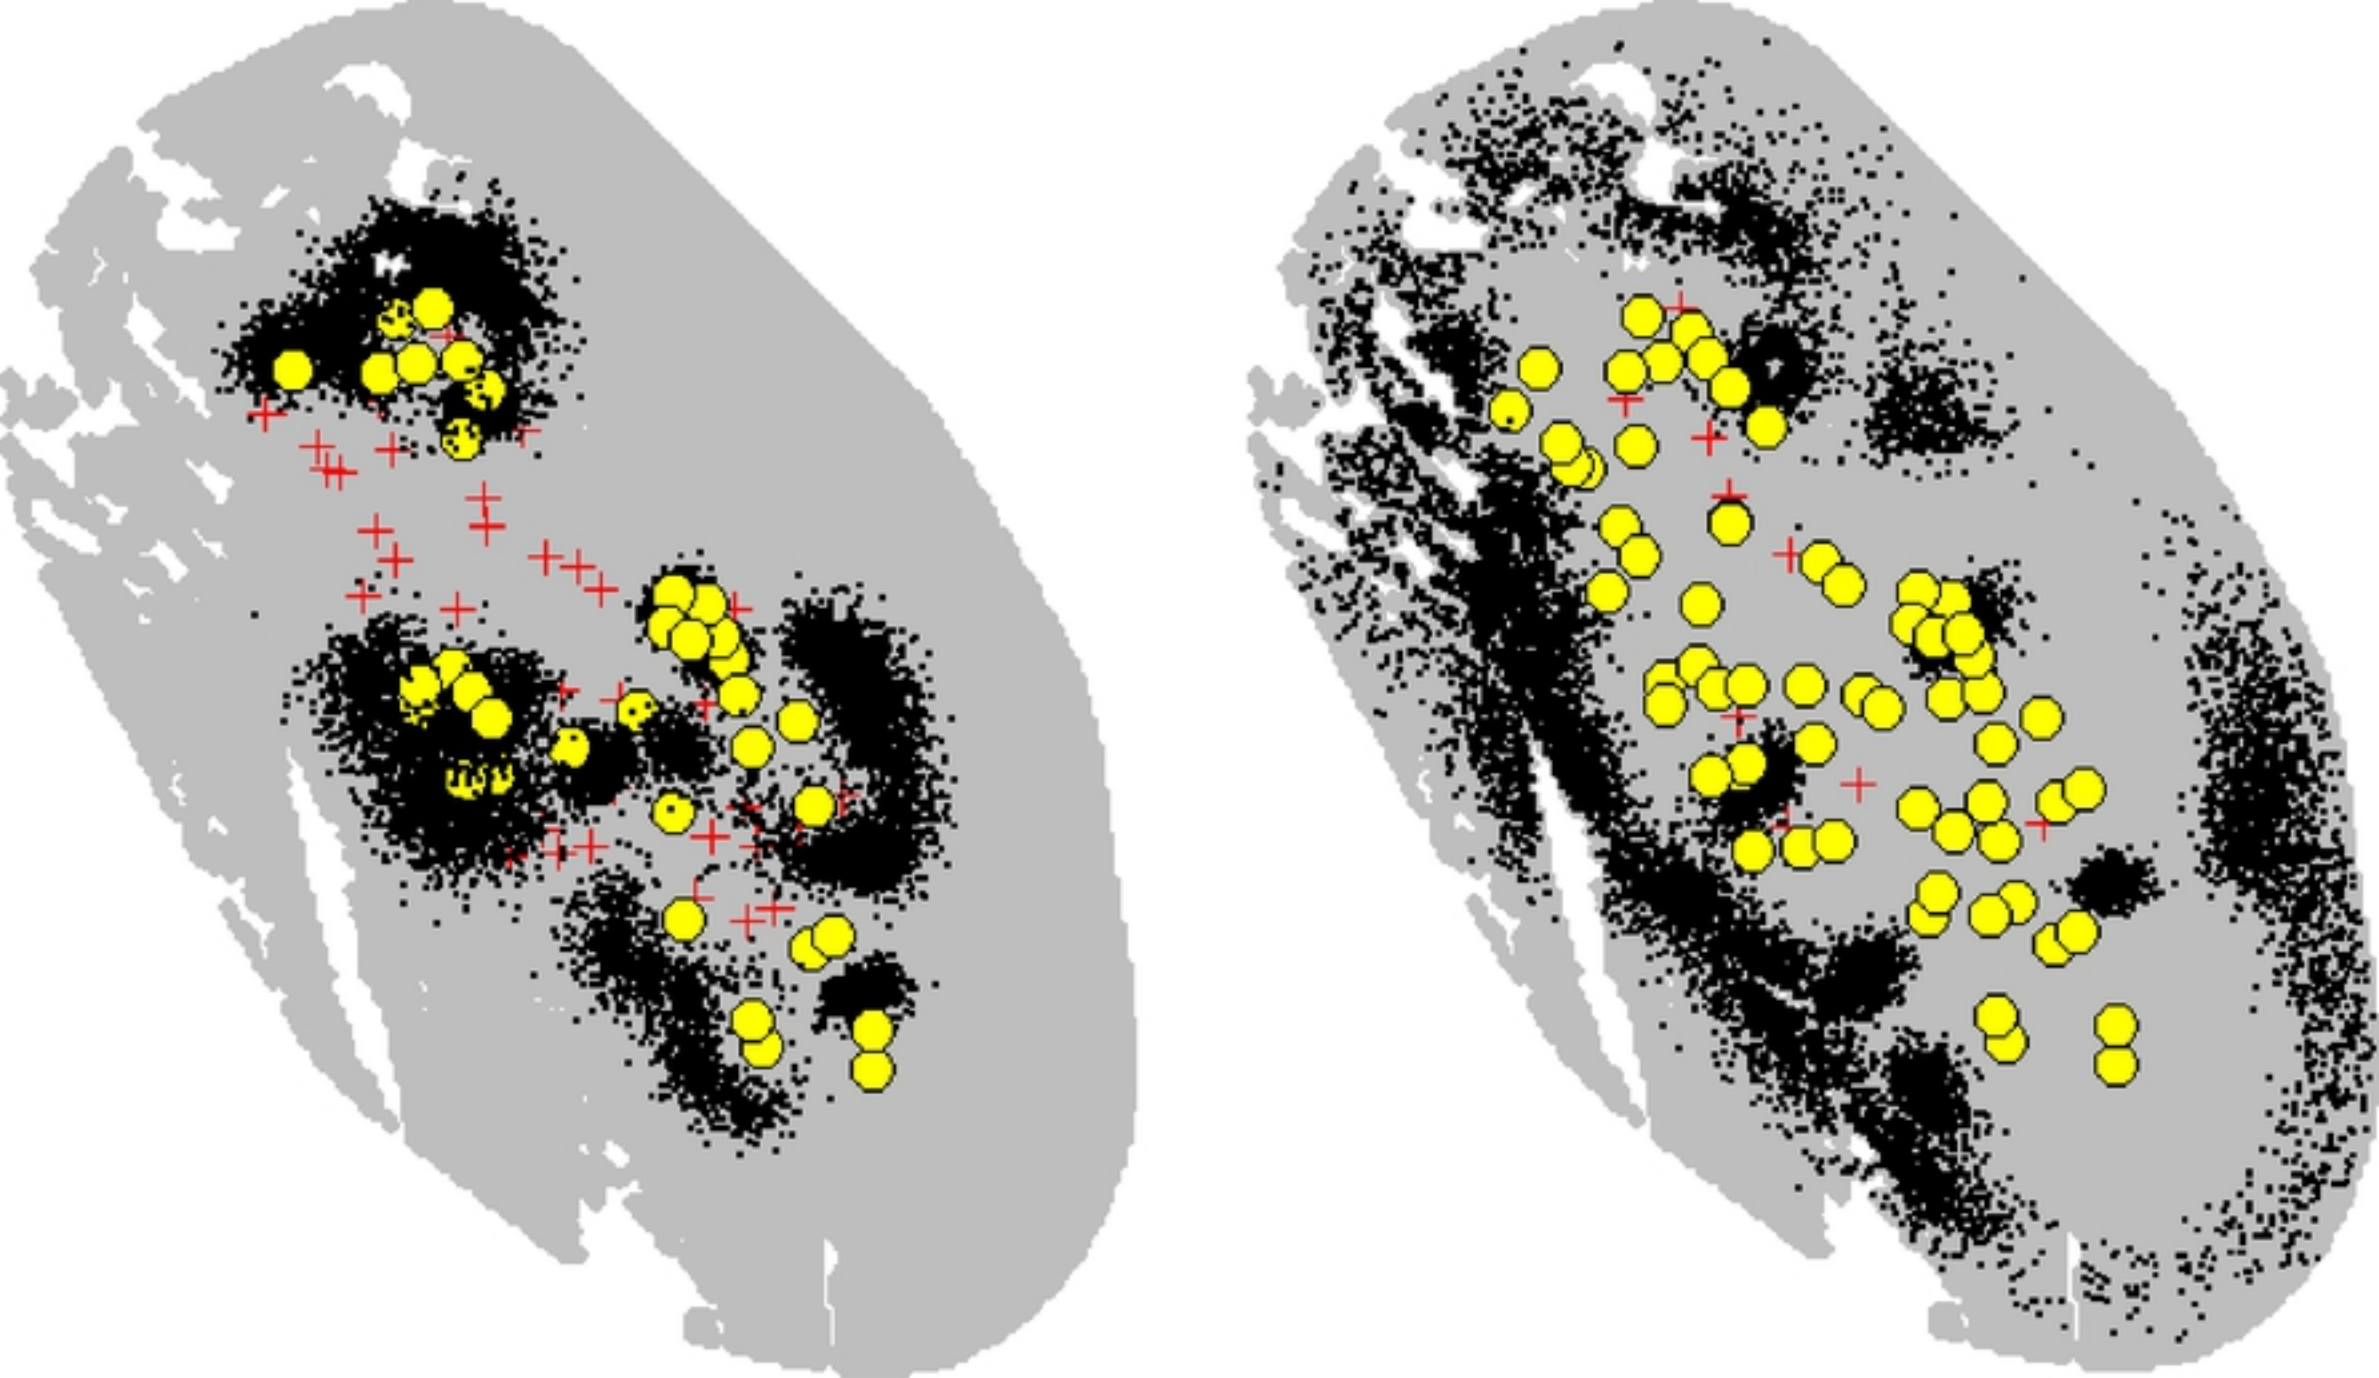

Fig 6. Activity centre posterior distributions (black dots); capture
